# Supplementary material for: Post-pandemic social contacts in Italy: implications for distancing measures on in-person school and work attendance
Source: Research Square preprint supplement (doi:10.21203/rs.3.rs-6009950/v1), 2025-11-01
Supplement: Supplementary file 1 [file 2a70daaa4aaa82640a713c48.docx]

**Supplementary Information
*“Post-pandemic social contacts in Italy: implications for social distancing measures on in-person school and work attendance”***

Table of Contents

[1. Materials and Methods 3](#_Toc189039077)

[1.1 Data 3](#_Toc189039078)

[Survey methodology 3](#_Toc189039079)

[Data cleaning 3](#_Toc189039080)

[Data representativeness 5](#_Toc189039081)

[1.2 Indirect contacts augmentation 8](#_Toc189039082)

[1.3 Statistical Framework 10](#_Toc189039083)

[1.4 Computation of contact matrices 12](#_Toc189039084)

[Reciprocity adjustment 12](#_Toc189039085)

[Bootstrapping contact matrices 13](#_Toc189039086)

[1.5 Effect of school and work attendance on the transmissibility of a generic respiratory virus 14](#_Toc189039087)

[Baseline scenario 14](#_Toc189039088)

[Alternative scenarios 14](#_Toc189039089)

[2. Additional figures and results 17](#_Toc189039090)

[2.1 Main analysis 17](#_Toc189039091)

[Comparing the data with previous studies: POLYMOD2 and CoMix7 17](#_Toc189039092)

[Modelling the determinants of social contacts: covariates description 20](#_Toc189039093)

[Modelling the determinants of social contacts for the underage population under scenario 1A assumptions 22](#_Toc189039094)

[Contact matrices by setting 23](#_Toc189039095)

[2.2 Additional details on direct and indirect social contacts 25](#_Toc189039096)

[2.3 Sensitivity analysis on direct contacts only 28](#_Toc189039097)

[Modelling the determinants of direct social contacts 28](#_Toc189039098)

[Social contacts matrices for direct contacts 29](#_Toc189039099)

[Reduction in transmissibility using direct contacts only 30](#_Toc189039100)

[2.4 Sensitivity analysis for social contacts under scenario 1B 31](#_Toc189039101)

[Social contacts matrices for scenario 1B 31](#_Toc189039102)

[Reduction in transmissibility for scenario 1B 32](#_Toc189039103)

[2.5 Using responses from the 2023 wave only 33](#_Toc189039104)

[References 34](#_Toc189039105)

[3. Social contact survey: English translation 36](#_Toc189039106)

# 1. Materials and Methods

## 1.1 Data

The analysis presented in this manuscript is based on a novel social contact survey data collection. The data collection consisted of two waves of more than 3500 responses each. The first ran from March 17, 2022, until March 29, 2022, and the second ran from March 17, 2023, until April 5, 2023. The survey was designed to include both a panel and a longitudinal set of responses: about half of the responses collected in the second wave were obtained from respondents who had already participated in the first wave. In this section, we provide details about the survey design and data cleaning procedure that was adopted in the study.

### Survey methodology

We engaged the market research firm *YouGov* to carry out a survey on a representative sample of the Italian population in terms of age, sex, and NUTS level-1 area of residence. Members of YouGov’s existing online panel (adults aged 18 and older) were invited to participate through email invitations. Adults with underage children were randomly asked to administer the survey to one of their children or involve them in the completion process. Children’s involvement differed based on their age: those aged 14 to 17 were asked to directly respond to the survey, with their parent’s support; legal guardians of children aged less than 14 years were asked to compile the survey themselves and request their children’s feedback, e.g., on if and with whom their children had social contacts.

Participants were asked to provide socio-demographic information (such as age, gender, household income, educational attainment, and occupation) as well as health-related information (such as their COVID-19 vaccination status, whether they had ever had a positive SARS-CoV-2 test and when, or if they suffered from chronic or acute diseases at the time of data collection). Additionally, the survey collected information about the respondents' cohabitants (such as age, chronic diseases, or acute diseases of any cohabitants). The full questionnaire is reported in its English translation in Section 3 of this Appendix.

To facilitate the recall of contacts and to reduce the impact of respondents’ fatigue on the number of reported contacts, participants were first asked to report a list of direct contacts (identified by nicknames chosen by the participants) for each setting: home (cohabitants or other contacts at home), work, school, restaurants, leisure places, transportation means, and other places). After the collection of all lists, respondents were asked to report information about each individual contact and how the interaction occurred (e.g. the age and sex of the contact, whether it occurred in an open or closed setting, whether there was any physical interaction, the type of relation with the contact, the contact’s COVID-19 vaccination status, their perceived income, who was wearing a mask during the interaction, etc.). In the last part of the questionnaire, participants were also asked to report the overall number of persons with which they shared an indoor space for a period of more than 30 minutes (indirect contacts, e.g., schoolmates, co-workers, people in public transport means), including in the number people already reported as direct contacts.

The survey was tested on a pilot sample of respondents to control for completion time and flow. Results from the analysis of the pilot responses reported a median completion time of about 15 minutes. Post-collection analysis confirmed similar completion times for both waves.

### Data cleaning

Before proceeding with the analysis reported in the main manuscript, we performed four main data-cleaning steps, displayed as a flowchart in Figure SI1.

In the first data-cleaning step, we tackled issues that could affect the reliability of contacts reported by some respondents; as an example, students reporting to have attended school during school closure periods (e.g. on a Sunday) were excluded from the results. Additionally, we identified four main categories of potential contact-specific problems that also resulted in the exclusion of the respondent:

- **Duplicated contacts**: The online survey platform applied checks to prevent the respondents from writing the same nickname twice, in order to avoid double-reporting of the same contact across different settings. Nevertheless, some respondents bypassed the quality check. Contacts for which respondents listed the same pair of nickname and age across multiple settings were considered duplicated contacts. The nickname check was bypassed by respondents in two ways:
  - The duplicates were listed in the “cohabitants” section (for which no check was implemented) and in at least another location section.
  - The duplicates are listed in different locations, with slight modifications of the nickname (e.g., “Alice a friend” and “Alice, a friend”, or “Mother” and “mother”).
- **Multiple contacts per entry**: some respondents reported more than one contact per line, using plurals, collective nouns, or providing the number of contacts (e.g., “10 friends”, “parents”, “clients”).
- **Settings and contexts**: some respondent reported the names of the context or setting where they encountered contacts (e.g., “the supermarket”, “Football”). This issue particularly affected contacts in crowded situations or where they could not easily be listed by the respondent.
- **Other issues**: other problematic entries which could not be otherwise classified. For instance, some respondents listed themselves among the contacts or reported “no one”. Others wrote sentences by using the different available lines, e.g., to express they did not want to disclose them (e.g., “no” – “don’t” – “declare”).

Note that answers from a single respondent were possibly affected by more than one issue at the same time.

In the case of contacts responding in both waves, only the problematic response was deleted.

In the second step, we cleaned the dataset from responses declaring the adoption of any kind of isolation measure (whether mandatory or voluntary) on the previous day, or for which the information was missing.

In the third step, we dropped all responses for which any of the 35 variables considered in the statistical framework (see below) was missing.

Finally, we excluded 49 respondents who either reported more than 100 contacts or were children reporting 0 contacts.

At the end of the data cleaning process, we excluded 2339 responses, leaving a total of 4,979 unique responses. Figure SI1 shows the impact of each step of the cleaning procedure on the dataset for each wave.

**Figure SI1**: *Data cleaning procedure flowchart*. This chart quantifies the impact of each cleaning step on the dataset size. On the right, at each step, we report the number of responses affected by the cleaning step (in parenthesis we report the affected responses for each wave separately, namely for the data from 2022 and for 2023).

### Data representativeness

In this section, we compare the characteristics of survey respondents who successfully completed the entire survey and passed all the quality checks described in the previous sections against official 2022 data from the European Union Statistical Office (EUROSTAT)1. Figure SI2 shows the fraction of respondents by age group (light blue bars), and the corresponding EUROSTAT figures (empty red bars). We found a good population representativeness by age, with some deviations in the underage and younger adult population. Figure SI3 compares pair-wise combinations of age, area of residence, and gender for the respondent. Full-coloured bars show the fraction of each population group within the survey respondents panel while empty-red bars report the corresponding European Union Statistical Office estimates for the Italian population. Age distribution stratified by area of residence is representative of the expected population distribution by age (as shown in Fig. SI2). Similarly, a gender-based stratification shows an underrepresentation of the female population group in the oldest age group. The “lower secondary and below” educational attainment group was underrepresented; this result is a known weakness of online surveys, which systematically show a lower level of participation from this population group.

**Figure SI2:** *Survey respondents by age against the Italian population.* Light blue bars report the distribution of respondents by age group. Darker blue bars show the distribution by age of the respondents’ reported contacts. The overlayed red bars report the fraction of the population by age group reported for 2022 by the Statistical Office of the European Union.

**Figure SI3:** *Survey respondents by age and area of residence, age and gender, area of residence and gender, and educational attainment and gender against the Italian population.*  Full-coloured bars show the distribution of the survey respondents; overlayed red bars report the corresponding values reported for 2022 by the Statistical Office of the European Union. Reference national values for educational attainment by gender are sourced for 2020 from the Italian National Statistical Office

## 1.2 Indirect contacts augmentation

As discussed in the main manuscript, the analyses performed in this work consider both direct contact information, as defined by traditional social contact surveys, and information about indirect contacts, defined as events of a minimum duration of 30 minutes, occurring in a closed environment (such as a house, restaurant, transportation means, etc.). Indirect contacts were reported in the form of a single numerical estimate without any additional information, e.g., about the setting in which they occurred or the contacts’ characteristics. Thus, to compute social contact matrices that also include direct contacts we augmented the available information by: i) determining how many of the indirect contacts were already reported as direct social contacts, and ii) assigning to indirect contacts information on where and with whom the interaction happened.

#### Direct and indirect contacts overlap

Respondents were requested to include in the estimate of indirect contacts also direct contacts that satisfied the indoor contacts’ definition. A lower and an upper bound for the number of non-overlapping indirect contacts can be obtained by considering the two extreme cases:

1. all indoor direct contacts shared an indoor space for more than 30 minutes with the respondent.
2. none of the indoor direct contacts shared a space with the respondent for more than 30 minutes.

For example, if the reported direct contacts were N=6, of which 2 occurred indoors with cohabitants, 2 indoors at work, and 1 indoors at a leisure place (resulting in X=5 direct indoor contacts), and the indirect (indoor) contacts reported were Y=21, the two scenarios would translate into having a total number of social contacts equal to between 22 (*scenario 1*, with N direct contacts and Y-X additional indirect contacts), and 27 (*scenario* *2*, with N direct contacts and Y additional indirect contacts).

#### Where and with whom?

To effectively use the indirect contacts reported by a respondent, the contact information for additional indirect contacts had to be inferred. Two alternative approaches were considered in this work to assign setting and contact information to indirect contacts.

1. The first assumes that indirect contacts had similar characteristics as direct contacts and were encountered in the same types of settings, excluding cohabitants (to avoid artificial inflation of within household contacts). Thus, if a respondent reported X direct indoor contacts and Y indirect contacts, the information on the Y indirect contacts would be augmented by sampling directly from the reported X direct indoor contacts, excluding contacts with cohabitants and those encountered outdoors.

Using the example from the paragraph above, contact information would have been sampled Y-X=16 times in contact *scenario 1*. In this case, augmentation would be done by randomly sampling contact information from all indoor direct contacts (resulting, e.g., in 11 indirect contacts sampled from work-related direct contacts, and 5 contacts sampled from indoor leisure-related contacts).

1. The second approach assumes that all indirect contacts occurred in the setting where the majority of direct contacts were reported, excluding the household. Using the example above under *scenario 1*, this assumption translates into sampling 16 indirect contacts using only contact information from the indoor work setting.

| **Table SI1:** *Description of the different scenarios for indirect contact inclusion.* | | **Including indirect contacts** | |
| --- | --- | --- | --- |
|  | | Scenario 1  *Increment social contacts with Y-X additional indirect contacts* | Scenario 2  *Increment social contacts with all Y indirect contacts* |
| **Enriching indirect contacts** | Scenario A  *Sampling proportionally to indoor settings* | **Scenario 1A**  *(Main analysis)* | **Scenario 2A** |
| Scenario B  *Sampling from dominant indoor setting* | **Scenario 1B** | **Scenario 2B** |

In the main analysis, the total number of contacts considered direct and completely overlapping indirect contacts where contact information augmentation was performed proportionally to the setting (scenario 1A).

Sensitivity analyses were run for alternative assumptions (scenario 1B and scenario 2A) to assess their impact on the statistical model, the contact matrices, and the transmissibility reduction. Results are reported in section 2 of this Appendix.

## 1.3 Statistical Framework

In this section, we report detailed information about the model selection procedure and the covariate screening procedure.

We model individual number of contacts using a negative binomial distribution, a standard choice to model count data with potential overdispersion2. Let *Yit* represent the total number of contacts for the individual *i* observed at wave *t*. We assume that *Yit* follows a negative binomial distribution with mean and dispersion parameter *ϕ*:

with being a random intercept that accounts for within-individual correlation across waves (. Note that, as observations may be repeated across waves, capturing within-individual correlation is essential to correctly account for baseline differences among individuals.

In this framework, the conditional expected value is modelled as:

where:

- is a vector of individual-level covariates that are constant across waves (e.g., age, sex, and occupation).
- is the vector of fixed effect coefficients for these fixed covariates.
- is a vector of time-varying covariates that may change across waves (e.g. attendance at work/school, occupation, whether the response was provided on Sunday, or whether the respondent recently tested positive to COVID-19).
- is the vector of fixed effect coefficients for these time-varying covariates.
- is an indicator for wave, with coefficient , capturing systematic differences between waves.
- represents the interaction terms between the wave indicator and each time-varying covariate .
- is the vector of coefficients for these interaction terms, allowing us to test whether the effect of time-varying covariates is mediated by the time of the survey.
- is the random intercept term.

This mathematical structure is referred to as Generalised Linear Mixed Effects Model (GLMM) with a negative binomial outcome distribution and a log link function.

Given the extensive set of 35 covariates (see Table SI5 for a full list of covariates), we first assessed each variable’s association with the outcome using separate regression models. The model formulation reported above is general and can apply to different set of covariates. In this case, additionally to the specific variable screened, each separate model included a “wave” term and an interaction with the covariate to evaluate potential time-varying effects.

All covariates showing significant associations were included in the final multivariate negative binomial regression model presented in the main manuscript. The same covariates were used to model the different outcome variables discussed as robustness checks in Section SI2.1 and SI2.3.

## 1.4 Computation of contact matrices

We constructed age-specific matrices of average total contacts for the Italian population, stratified by 15 age groups (0-4, 5-9, 10–14, 15-19, 20-24, 25-29, 30-34, 35-39, 40-44, 45-49, 50-54, 55-59, 60-64, 65-69, and 70+ years old). Matrices were constructed by sampling 1000-times with replacement sets of social contact survey responses of the size of the cleaned survey responses. Then, matrices were normalised to account for reciprocal social contacts using national census population data aggregated by the same age groups (see below). Reciprocity-adjusted contact matrices resulting from each independent sampling were pooled together to provide age-stratified social contact average estimates and confidence intervals.

### Reciprocity adjustment

The idea behind reciprocal normalisation is to account for differences between the sample age distribution and the age distribution of the population under study. This is done considering the probability of an individual being included in the sample. The procedure adopted in this work follows the standard procedure described in full in Trentini et al.3 and summarized as follows.

Let denote the number of participants in the -th age group and let denote the number of contacts a specific study participant of age within had with individuals of the age group. The total number of contacts that all study participants of age have with individuals of age can be computed as

The average contacts an individual of age group has with individuals of age within can be approximated by the average contacts that a participant of age with individuals of age as follows:

In principle, can be different from . However, in the case of social contacts, if we were to sample the entire Italian population this should not be the case as all reported contacts should be reciprocal. To correct matrices drawn from only a partial sampling of the population we can, however, reconstruct reciprocity by considering the probability of an individual being included in the sample and correcting it using the total number of contacts that all study participants of age have with individuals of age as a weighted average of the total contacts reported by participants of these two ages as follows. This can be expressed in a formula as:

where is the population within the age group in Italy as reported by the Statistics Agency of the European Union (Eurostat)1.

The adjusted average contacts an individual of age has with individuals of age was finally computed as

### Bootstrapping contact matrices

All the matrices presented in the main manuscript are computed by performing a 1000-fold bootstrapping of responses from both waves. The average number of contacts is computed as the average across the reciprocity-adjusted matrices originated from independent samples of survey responses. An average contact matrix is computed as the average across all bootstrapped samples and age groups: , with Q=1000 being the number of bootstrapped samples.

## 1.5 Effect of school and work attendance on the transmissibility of a generic respiratory virus

We assessed the effect of different scenarios of distance learning and work-from-home on the reduction of the basic reproduction number of a novel respiratory virus spreading in a fully susceptible population in the absence of other interventions.

### Baseline scenario

In the baseline scenario (s=0 in equations reported in the main text), all students are assumed to attend school in person, and the in-person workforce is set at pre-pandemic levels. To define and , we considered the Italian population by age as reported by Eurostat for the year 2022, stratified into 15 age-groups (0-4 years, 5-9, years, …, 65-69 years, 70+ years). We estimated the proportion of individuals of age group *i* enrolled to education level *k*, denoted by , based on data reported by Eurostat for the year 20214. Specifically, we considered 5 different education levels:

1. early childhood education (International Standard Classification of Education, ISCED 05);
2. primary education (ISCED 15);
3. lower secondary education (ISCED 25);
4. upper secondary education (ISCED 35);
5. tertiary education (ISCED 5-85).

Students enrolled on ISCED level 4, which, in Italy, includes only the 1-year Higher Technical Education and Training track – IFTS, were neglected as they represent less than 0.03% of Italian students4. We further considered the age-specific proportion of individuals of age-group *i* working in-presence before the COVID-19 pandemic (), as estimated by the Italian Workers Compensation Authority and reported in Marziano et al.6. The number of individuals of age *i* attending schools or work in-person in the baseline scenario (*s=0*) is computed as:

=

and the number of individuals not attending is given by:

.

### Alternative scenarios

We then considered a set of alternative scenarios combining the physical closure of different education levels, starting from tertiary education and progressively including lower levels, with decreasing levels of in-person work attendance.

Specifically, we considered the following levels of school closure (i.e., distance learning):

- no education level closed;
- only tertiary education closed (ISCED 5-8);
- tertiary and upper secondary education closed (ISCED 5-8 and ISCED 3);
- tertiary; upper secondary; lower secondary education closed (ISCED 5-8 and ISCED 3, ISCED 2);
- tertiary; upper secondary; lower secondary, primary closed (ISCED 5-8 and ISCED 3, ISCED 2, ISCED 1);
- All education levels closed, i.e. tertiary; upper secondary; lower secondary, primary and early childhood (ISCED 5-8 and ISCED 3, ISCED 2, ISCED 1, ISCED 0).

We also considered three levels of in-person work attendance:

- “Pre-pandemic”, i.e. the age-specific proportion of in-person work attendance is set at pre-pandemic levels;
- “Sustainable”, reflecting the proportion of in-person workers observed in Italy after the reopening of economic activities following the 2020 COVID-19 lockdown on May 18, 2020;
- “Minimum”, where only essential workers are allowed to work in person, as during the COVID-19 lockdown.

The age-specific proportions of in-person workers associated with the “Sustainable” and “Minimum” scenarios ( and ) were estimated by the Italian Workers Compensation Authority and are available from Marziano et al.6 and reported in Figure 3B in the main text.

The resulting 18 scenarios (including the baseline) are reported in Table SI2.

**Table SI2:** *Description of intervention scenarios considered.*

|  | | **Level of in-person work** | | |
| --- | --- | --- | --- | --- |
| Pre-pandemic | Sustainable  *(no closure of economic activities)* | Minimum  *(only essential activities)* |
| **Level of school closure** | **No level closed** | Scenario 0  *(Baseline)* | Scenario 1 | Scenario 2 |
| **ISCED 5-8**  *(tertiary)* | Scenario 3 | Scenario 4 | Scenario 5 |
| **ISCED 3-8**  *(tertiary and upper secondary)* | Scenario 6 | Scenario 7 | Scenario 8 |
| **ISCED 2-8**  *(tertiary; upper secondary; lower secondary)* | Scenario 9 | Scenario 10 | Scenario 11 |
| **ISCED 1-8**  *(tertiary; upper secondary; lower secondary; primary)* | Scenario 12 | Scenario 13 | Scenario 14 |
| **All levels closed**  *(from early childhood to tertiary)* | Scenario 15 | Scenario 16 | Scenario 17 |

# 2. Additional figures and results

## 2.1 Main analysis

### Comparing the data with previous studies: POLYMOD2 and CoMix7

The data presented in the main manuscript complement previous social contact data, providing updated information collected during a period when COVID-19 measures in Italy (both at the governmental and individual level) were receding (wave 1) or had been removed altogether (wave 2). In particular, the data from the second wave were collected only one month before the WHO declared the end of the COVID-19 epidemic as a public health emergency of international concern8. We compared data with two previous social contact studies in Italy: POLYMOD2, a paper-based survey conducted in April 2006; and CoMix - Italy9, a series of online surveys conducted at different times during the pandemic. For CoMix, we selected Wave A6 and A7 as they took place in 202,1 roughly in the same months as our study (part of the Epipose Project Italy9,10). As A6 and A7 only included adult respondents, we similarly pooled data about the underage population from waves C1 and C2 (survey waves focused on the underage population only). During this period, the SARS-CoV-2 Alpha variant was dominant in Italy, COVID-19 vaccination was being rolled out, and strict COVID-19 control measures were in place. Tables SI3 and Table SI4 report the number of participants and average reported contacts for the three studies, stratifying the information by different groups of respondents. Data for comparison were obtained through the *socialmixr* project11.

Table SI3: *Survey respondents and average contacts by wave - comparing Polymod, CoMix, and our study*. The table reports the sample size and average number of social contacts stratified by different respondent characteristics (95% Confidence Intervals are reported in parenthesis): age, sex, household size, and day of the week.

|  | |  | | Polymod | | CoMix | | This study | | | |
| --- | --- | --- | --- | --- | --- | --- | --- | --- | --- | --- | --- |
|  | |  | **April 2006** | | | **February-April 2021**  **(A6, A7, C1, C2)** | | **March 2022** | | **March-April 2023** | |
|  | **Category** | | | **count** | **mean** | **count** | **mean** | **count** | **mean** | **count** | **mean** |
| All | | **All** | | 846 | 19.8 (19 - 20.6) | 1883 | 3.6 (3.3 - 3.9) | 2474 | 7.3 (6.9 - 7.7) | 2505 | 7.8 (7.3 - 8.2) |
| Age | | **0-4** | | 77 | 14.9 (12.7 - 17.1) | 433 | 6.2 (5.3 - 7.1) | 76 | 9 (7.2 - 10.9) | 54 | 12 (8.9 - 15.5) |
| **5-17** | | 224 | 24.9 (23.2 - 26.5) | 295 | 2.6 (2.3 - 3) | 233 | 12.8 (11.4 - 14.3) | 156 | 14.4 (12.4 - 16.5) |
| **18-29** | | 112 | 20.7 (18.5 - 23) | 161 | 5.7 (4.7 - 6.8) | 208 | 10.6 (8.7 - 12.8) | 190 | 10.9 (9 - 13.1) |
| **30-39** | | 104 | 18.4 (16.5 - 20.4) | 229 | 2.8 (2.2 - 3.6) | 376 | 8 (6.8 - 9.3) | 357 | 8.8 (7.7 - 10.1) |
| **40-49** | | 119 | 19.3 (17.1 - 21.5) | 198 | 2.4 (2 - 3.1) | 381 | 6 (5.1 - 7.2) | 339 | 6.7 (5.8 - 7.8) |
| **50-59** | | 105 | 18.9 (16.6 - 21.3) | 151 | 2.8 (1.9 - 4.4) | 432 | 6.3 (5.4 - 7.2) | 506 | 7.4 (6.5 - 8.4) |
| **60+** | | 98 | 13.7 (11.8 - 15.8) | 407 | 1.9 (1.8 - 2.1) | 768 | 5.5 (4.9 - 6.1) | 903 | 5.9 (5.3 - 6.6) |
| **NA** | | 7 | 23.4 (16.9 - 29) | 9 | 6 (1.9 - 13) | - | - | - | - |
| Sex | | **Female** | | 438 | 19.3 (18.1 - 20.4) | 1176 | 4.3 (3.8 - 4.7) | 1226 | 7.1 (6.6 - 7.7) | 1233 | 7.3 (6.8 - 7.9) |
| **Male** | | 401 | 20.3 (19.1 - 21.5) | 703 | 2.4 (2.2 - 2.6) | 1248 | 7.5 (6.9 - 8.1) | 1272 | 8.2 (7.6 - 8.9) |
| **NA** | | 7 | 23.4 (17 - 29.1) | 4 | 13 (7 - 22.8) | - | - | - | - |
| Household Size | | **1** | | 48 | 15 (11.8 - 18.4) | 171 | 0.9 (0.6 - 1.1) | 357 | 5.2 (4.5 - 6) | 355 | 5.9 (4.9 - 7) |
| **2** | | 110 | 17.2 (15.1 - 19.4) | 439 | 2 (1.6 - 2.6) | 745 | 5.7 (5 - 6.5) | 844 | 6.5 (5.7 - 7.2) |
| **3** | | 227 | 18.4 (16.9 - 20) | 577 | 3.6 (3.1 - 4.1) | 732 | 8.2 (7.3 - 9.1) | 677 | 8.5 (7.6 - 9.4) |
| **4** | | 333 | 21.7 (20.5 - 23) | 555 | 5.1 (4.5 - 5.8) | 502 | 9.1 (8.2 - 10.1) | 492 | 9.6 (8.6 - 10.6) |
| **5** | | 98 | 21.1 (18.4 - 23.9) | 107 | 5.4 (4.1 - 7.3) | 114 | 9.7 (8.1 - 11.7) | 104 | 10.3 (8.4 - 12.6) |
| **6+** | | 30 | 21 (16.7 - 25.5) | 33 | 6.7 (5.2 - 8.8) | 24 | 13.9 (8.2 - 22.3) | 33 | 13.5 (9.6 - 17.9) |
| **NA** | | - | - | 1 | 2 (1 - 2) | - | - | - | - |
| Day | | **weekday** | | 620 | 21.1 (20.2 - 22.1) | 1565 | 3.8 (3.5 - 4.1) | 1827 | 7.4 (6.9 - 7.9) | 1757 | 8.3 (7.8 - 8.9) |
| **weekend** | | 226 | 16 (14.6 - 17.5) | 318 | 2.6 (2.1 - 3.4) | 647 | 7.2 (6.3 - 8.2) | 748 | 6.5 (5.8 - 7.3) |

Table SI4: *Survey average contacts by wave and contact setting - comparing Polymod, CoMix, and our study*. The table reports the sample size and average number of social contacts in different location settings (95% Confidence Intervals are reported in parenthesis): home, work, school, transportation means, leisure places, and other locations.

| Setting | Polymod | | CoMix | | This study | | | |
| --- | --- | --- | --- | --- | --- | --- | --- | --- |
|  | **April 2006** | | **February-April 2021**  **(A6, A7, C1, C2)** | | **March 2022 wave** | | **March 2023 wave** | |
|  | **count** | **mean** | **count** | **mean** | **count** | **mean** | **count** | **mean** |
| home | 781 | 3.8 (3.7 - 4) | 1492 | 1.8 (1.7 - 1.9) | 2206 | 4.8 (4.5 - 5.2) | 2268 | 4.9 (4.6 - 5.2) |
| work | 258 | 3.4 (2.9 - 3.9) | 128 | 0.2 (0.1 - 0.4) | 375 | 0.7 (0.6 - 0.9) | 403 | 0.9 (0.8 - 1.1) |
| school | 323 | 5.3 (4.7 - 5.9) | 158 | 0.8 (0.6 - 1) | 118 | 0.4 (0.3 - 0.5) | 98 | 0.4 (0.3 - 0.5) |
| leisure | 527 | 3.7 (3.3 - 4) | 15 | 0 (0 - 0) | 394 | 0.5 (0.5 - 0.6) | 474 | 0.6 (0.5 - 0.7) |
| transport | 162 | 0.5 (0.4 - 0.7) | 23 | 0 (0 - 0) | 121 | 0.1 (0.1 - 0.2) | 132 | 0.1 (0.1 - 0.1) |
| other | 490 | 3 (2.7 - 3.4) | 469 | 0.7 (0.6 - 0.9) | 648 | 0.7 (0.6 - 0.8) | 724 | 0.9 (0.8 - 1) |

### Modelling the determinants of social contacts: covariates description

Table SI5: *Description of the covariates used in the statistical modelling framework*. The table reports the name, type, description, and possible values of all the covariates used in the negative binomial regression.

| Name | Type | Description | Values |
| --- | --- | --- | --- |
| region_grouped_it | Categorical | Italian macro-region of residence of the respondent (ISTAT categorization) | - North-West - North-East - Center - South - Islands |
| respondent_gender | Binary | Gender of the respondent | - Male - Female |
| education | Categorical | Over 17: Educational level achieved by the respondent (ISCED categorization) | - Lower secondary or below - Upper secondary - Tertiary or above |
| Under 17: Educational level achieved by the respondent’s parent (ISCED categorization) |
| occupation_agg | Categorical | Over 16: Respondent’s job category | - Employed - Home/family - Student - Retired - Inactive |
| Under 16: Job category of the respondent’s parent |
| d_occupation | Binary | Over 16: Respondent’s job category | - Employed/student - Other (not working) |
| Under 16: Job category of the respondent’s parent |
| occupation_agg2 | Categorical | Over 16: Respondent’s job category | - Employed - Student - Other (not working) |
| Under 16: Job category of the respondent’s parent |
| sunday | Binary | Contact diary refers to Sunday | - Yes - No |
| weekend | Binary | Contact diary refers either to Saturday or Sunday | - Yes - No |
| worked_in_presence | Binary | Over 16: The respondent worked in-presence on the day prior to survey filling | - Yes - No (remote work, no work) |
| presence_school | Categorical | Under 16, students over 16: teaching method followed on the day prior to the survey filling | - In person - Remotely - Did not attend |
| attend_in_presence | Binary | The respondent worked or followed class at school in-presence the day prior to the survey filling | - Yes - No |
| d_children | Binary | The respondent lives with at least one minor in their household | - Yes - No |
| d_senior65 | Binary | The respondent lives with at least one person aged 65 or more in their household | - Yes - No |
| d_senior70 | Binary | The respondent lives with at least one person aged 70 or more in their household | - Yes - No |
| d_senior75 | Binary | The respondent lives with at least one person aged 75 or more in their household | - Yes - No |
| d_senior80 | Binary | The respondent lives with at least one person aged 80 or more in their household | - Yes - No |
| d_hh_size | Binary | The respondent has at least a cohabitant | - Yes - No |
| hh_size | Categorical | Household size (respondent included) | - 1 - 2 - 3 - 4 - 5+ |
| hh_size_det | Numeric | Household size (respondent included) | - [1-8] |
| chronic_comorb_self2 | Binary | The respondent has at least a comorbidity known to be associated with severe COVID-19 outcomes[[1]](#footnote-2)* | - Yes - No |
| chronic_comorb_cohab2 | Binary | At least one of the respondent’s cohabitant has at least a comorbidity known to be associated with severe COVID-19 outcomes* | - Yes - No |
| covid | Binary | The respondent has been officially diagnosed with COVID-19 at least once | - Yes - No |
| time_since_covid | Categorical | Time passed since last officially diagnosed COVID-19 infection | - Had COVID-19 – less than 120 days ago - Had COVID-19 – more than 120 days ago - Had COVID-19 – but reported no date - Didn’t have COVID-19 |
| d_time_since_covid | Binary | The respondent has been officially diagnosed with COVID-19 in the 4 months prior to the survey filling | - Yes - No |
| income_1000 | Categorical | Respondent’s family income | - <1000 eur - 1000-1999 eur - 2000-2999 eur - 3000-3999 eur - 4000-4999 eur - >5000 eur - Didn’t answer |
| income | Categorical | Respondent’s family income | - <1000 eur - 1000-1499 eur - 1500-1999 eur - 2000-2499 eur - 2499-2999 eur - 3000-3499 eur - 3500-3999 eur - 4000-4499 eur - 4500-4999 eur - >5000 eur - Didn’t answer |
| income_threecat | Categorical | Respondent’s family income | - <1500 eur - 1500-2999 eur - >3000 eur - Didn’t answer |
| knows_severe | Binary | The respondent knows someone who was hospitalized/died due to COVID-19 | - Yes - No |
| age_group_10 | Categorical | Age group of the respondent | - 0-17 y - 18-29 y - 30-39 y - 40-49 y - 50-59 y - 60-69 y - 70+ y |
| age_group_25 | Categorical | Age group of the respondent | - 0-17 y - 18-44 y - 45-69 y - 70+ y |
| wave | Categorical | Survey wave | - 1 - 2 |
| EPID | - | Alphanumeric code that uniquely identifies respondents across survey waves | - |

### Modelling the determinants of social contacts for the underage population under scenario 1A assumptions

**Figure SI4:** *Model results for the underage population under scenario 1A assumptions.* Each panel in the figure shows the rate ratio for the number of direct and indirect social contacts in the underage population using prolonged proportional contacts for each of the model’s covariates.

### Contact matrices by setting

This section reports the contact matrices by setting the total number of social contacts under the assumptions described as *scenario 1A* (see Section SI1.2 and Table SI1).

Figure SI5 shows the contact matrices for the entire survey population. Figure SI6 and Figure SI7 show the contact matrices for the survey respondents attending and not attending in-person to work or school activities.

**Figure SI5:** *Contact matrices by setting under scenario 1A assumptions on social contacts.*

**Figure SI6:** *Contact matrices by setting of individuals working or attending school in-person under scenario 1A assumptions.***Figure SI7:** *Contact matrices by setting for individuals not working or attending school in-person under scenario 1A assumptions.*

## 2.2 Additional details on direct and indirect social contacts

In this section, we separately report contact information stratified by respondent characteristics for direct and indirect contacts. The numbers reported in Table SI6 and SI7 show the average reported contacts for the two contact types. Table SI8 report the contacts by setting for direct, indirect and the minimum set union, i.e. the total social contacts as presented in the main manuscript, for the different settings.

Table SI6: *Survey average contacts by wave and contact type*. The table reports the average number of direct and indirect social contacts (and 95% C.I.) stratified by different respondent characteristics: age, sex, household income, and household size.

| Variables | March 2022 wave | | | March 2023 wave | |
| --- | --- | --- | --- | --- | --- |
| **Direct Contacts** **(95% C.I.)** | **Indirect Contacts** **(95% C.I.)** | **Direct Contacts** **(95% C.I.)** | | **Indirect Contacts** **(95% C.I.)** |
| Total | 4.6 (4.4 - 4.8) | 5.7 (5.2 - 6.1) | 4.9 (4.7 - 5.1) | | 6 (5.6 - 6.4) |
| Age group | | | | | |
| 0-9 | 6.8 (5.8 - 7.8) | 9.7 (8.2 - 11.4) | 7.2 (6.2 - 8.3) | | 10.6 (8.5 - 12.8) |
| 10-19 | 6.7 (5.9 - 7.6) | 11 (9.2 - 12.9) | 7 (5.8 - 8.3) | | 13.6 (11 - 16.3) |
| 20-29 | 5.1 (4.6 - 5.7) | 8.8 (6.9 - 11) | 5.7 (5.1 - 6.3) | | 9.1 (7 - 11.4) |
| 30-39 | 5.1 (4.7 - 5.5) | 6.3 (5.2 - 7.6) | 5.3 (4.9 - 5.8) | | 7.1 (5.9 - 8.3) |
| 40-49 | 4.3 (4 - 4.7) | 4.5 (3.6 - 5.6) | 4.6 (4.3 - 5) | | 5.2 (4.3 - 6.2) |
| 50-59 | 4.2 (3.8 - 4.5) | 4.6 (3.8 - 5.5) | 4.8 (4.4 - 5.2) | | 5.8 (4.9 - 6.8) |
| 60-69 | 4.1 (3.7 - 4.5) | 4.7 (3.6 - 5.8) | 4.4 (4 - 4.8) | | 4.4 (3.5 - 5.5) |
| 70+ | 3.4 (3.1 - 3.7) | 3 (2.4 - 3.7) | 4.2 (3.8 - 4.6) | | 3.7 (3.1 - 4.4) |
| Sex | | | | | |
| Male | 4.5 (4.3 - 4.7) | 5.7 (5.2 - 6.3) | 5 (4.8 - 5.3) | | 6.3 (5.7 - 7) |
| Female | 4.7 (4.5 - 5) | 5.6 (5 - 6.2) | 4.8 (4.6 - 5.1) | | 5.7 (5.2 - 6.2) |
| Household income |  |  |  | |  |
| <1,500 euro | 3.7 (3.4 - 4) | 4.3 (3.6 - 5.2) | 3.9 (3.6 - 4.2) | | 4.8 (4 - 5.7) |
| 1,500-2,999 euro | 4.8 (4.5 - 5) | 5.7 (5.1 - 6.5) | 5.1 (4.8 - 5.4) | | 5.8 (5.3 - 6.4) |
| >3,000 euro | 5.8 (5.4 - 6.2) | 7 (6 - 8) | 6.2 (5.8 - 6.6) | | 8.2 (7 - 9.4) |
| Doesn't answer | 4.1 (3.7 - 4.5) | 5.8 (4.8 - 6.8) | 4.3 (3.9 - 4.7) | | 5.2 (4.3 - 6.2) |
| Household size | | | | | |
| 1 | 3.4 (3 - 3.8) | 3.5 (2.8 - 4.3) | 3.5 (3.2 - 3.9) | | 4.4 (3.5 - 5.5) |
| 2 | 3.6 (3.3 - 3.8) | 4.2 (3.5 - 4.9) | 3.9 (3.7 - 4.2) | | 5 (4.2 - 5.7) |
| 3 | 4.8 (4.5 - 5.1) | 6.5 (5.7 - 7.5) | 5.3 (4.9 - 5.7) | | 6.6 (5.8 - 7.5) |
| 4 | 5.9 (5.5 - 6.3) | 7.4 (6.5 - 8.4) | 6.4 (6 - 6.8) | | 7.5 (6.6 - 8.5) |
| 5+ | 7.4 (6.7 - 8.2) | 8 (6.2 - 10.2) | 7.6 (6.7 - 8.6) | | 8.4 (6.6 - 10.5) |

Table SI7: *Survey average contacts by wave and contact type*. The table reports the average number of direct and indirect social contacts (and 95% C.I.) stratified by different respondent characteristics, only for respondents aged 18 and older: educational attainment, occupation, working mode (e.g. remotely or in-presence), teaching method (e.g. distance or in-presence learning), COVID-19 vaccinal status, and COVID-19 verified infections.

| Variables | March 2022 wave | | | | March 2023 wave | | |
| --- | --- | --- | --- | --- | --- | --- | --- |
| **Direct Contacts** **(95% C.I.)** | | | **Indirect Contacts** **(95% C.I.)** | **Direct Contacts** **(95% C.I.)** | **Indirect Contacts** **(95% C.I.)** | |
| Total | 4.3 (4.1 - 4.5) | | | 5 (4.6 - 5.4) | 4.7 (4.5 - 4.9) | 5.5 (5 - 5.9) | |
| Educational attainment | | | | | | | |
| Lower secondary or below | 3.5 (3.2 - 3.9) | | | 4.4 (3.4 - 5.6) | 3.8 (3.4 - 4.2) | 4.1 (3.2 - 5.2) | |
| Upper secondary | 4.2 (4 - 4.4) | | | 4.5 (4 - 5.1) | 4.6 (4.4 - 4.8) | 5 (4.5 - 5.5) | |
| Tertiary or above | 4.8 (4.5 - 5.1) | | | 6.1 (5.2 - 7) | 5.4 (5 - 5.7) | 6.9 (6 - 7.9) | |
| Employment status | | | | | | | |
| Employed (full or part-time) | | 5 (4.8 - 5.3) | 5.8 (5.2 - 6.5) | | 5.4 (5.1 - 5.7) | | 6.7 (6.1 - 7.4) |
| Looking after home/family | | 3.5 (3.1 - 3.9) | 2.7 (2.2 - 3.2) | | 4.1 (3.7 - 4.6) | | 4.5 (3.5 - 5.6) |
| Student (full- or part-time) | | 4.8 (4.1 - 5.6) | 10.6 (7.4 - 14.4) | | 5.4 (4.5 - 6.3) | | 10.3 (6.6 - 14.6) |
| Retired | | 3.4 (3.1 - 3.7) | 3.3 (2.6 - 4) | | 4.1 (3.7 - 4.4) | | 3.5 (2.9 - 4.1) |
| Inactive | | 3.3 (3 - 3.7) | 4.5 (3.1 - 6) | | 3.2 (2.9 - 3.6) | | 3.7 (2.8 - 4.6) |
| Working mode (only employed respondents during weekdays) | | | | | | | |
| Remote or did not attend | | 3.5 (3.1 - 3.9) | 3.5 (2.7 - 4.3) | | 4 (3.5 - 4.5) | | 4.1 (3.2 - 5.2) |
| In-presence | | 5.9 (5.5 - 6.2) | 6.4 (5.6 - 7.3) | | 6.4 (6 - 6.8) | | 8 (7 - 9.1) |
| School attendance (only student respondents during weekdays) | | | | | | | |
| In-presence | | 5.5 (4.1 - 6.9) | 13.6 (8.6 - 19.2) | | 5.5 (4.2 - 6.8) | | 15 (7.7 - 23.6) |
| Remote attendance | | 3.4 (2.5 - 4.4) | 6.2 (3.1 - 10.3) | | - | | - |
| Did not attend | | 4.7 (3 - 6.7) | 8.1 (2.4 - 15) | | 4.9 (3.5 - 6.5) | | 5.1 (2.9 - 8.4) |
| COVID-19 vaccination status | | | | | | | |
| None | | 3.8 (3.2 - 4.5) | 4 (2.8 - 5.5) | | 3.6 (3.1 - 4.1) | | 3.2 (2.5 - 4.1) |
| 1 dose | | 3.5 (1.9 - 5.2) | 2.1 (0.8 - 3.6) | | 5.3 (3.4 - 7.7) | | 4.8 (2.5 - 7.7) |
| 2 doses | | 4 (3.6 - 4.5) | 5.3 (3.9 - 7.1) | | 4.8 (4.3 - 5.4) | | 5.8 (4.5 - 7.3) |
| 3 doses or more | | 4.4 (4.2 - 4.6) | 5.1 (4.6 - 5.6) | | 4.8 (4.6 - 5) | | 5.6 (5.1 - 6.1) |
| Vaccine Exemption | | 2.1 (1.3 - 2.9) | 5.4 (0.9 - 13.6) | | 8.3 (4 - 12.9) | | 11.3 (2.2 - 28.4) |
| COVID-19 previous infection | | | | | | | |
| Yes | | 4.8 (4.4 - 5.2) | 5.8 (4.6 - 7) | | 4.9 (4.7 - 5.2) | | 6 (5.4 - 6.7) |
| No | | 4.2 (4 - 4.4) | 4.8 (4.4 - 5.3) | | 4.5 (4.3 - 4.8) | | 4.9 (4.4 - 5.5) |

Table SI8: *Survey average contacts by wave and contact setting*. The table reports the average number of direct, indirect, and total social contacts (and 95% C.I.) in different location settings: home, work, school, leisure places, transportation means, and other locations.

| **Variable** | **March 2022 wave** | | | **March 2023 wave** | | |
| --- | --- | --- | --- | --- | --- | --- |
| **Contacts** | **Direct (95% C.I.)** | **Indirect (95% C.I.)** | **Total (95% C.I.)** | **Direct (95% C.I.)** | **Indirect (95% C.I.)** | **Total (95% C.I.)** |
| **Total** | 4.6 (4.4 - 4.8) | 5.7 (5.2 - 6.1) | 7.3 (6.9 - 7.8) | 4.9 (4.7 - 5.1) | 6 (5.6 - 6.4) | 7.8 (7.3 - 8.2) |
| **Contact setting** | | | | | | |
| Home | 3 (2.9 - 3.1) | 3.8 (3.5 - 4.2) | 4.8 (4.5 - 5.2) | 3.1 (3 - 3.3) | 3.8 (3.5 - 4.1) | 4.9 (4.6 - 5.2) |
| Work | 0.5 (0.4 - 0.6) | 0.6 (0.5 - 0.7) | 0.7 (0.6 - 0.9) | 0.6 (0.5 - 0.6) | 0.8 (0.6 - 0.9) | 0.9 (0.8 - 1.1) |
| School | 0.2 (0.2 - 0.3) | 0.4 (0.3 - 0.4) | 0.4 (0.3 - 0.5) | 0.2 (0.1 - 0.2) | 0.3 (0.2 - 0.4) | 0.4 (0.3 - 0.5) |
| Leisure | 0.4 (0.3 - 0.4) | 0.3 (0.3 - 0.4) | 0.5 (0.5 - 0.6) | 0.4 (0.4 - 0.5) | 0.4 (0.4 - 0.5) | 0.6 (0.5 - 0.7) |
| Transport | 0.1 (0.1 - 0.1) | 0.1 (0.1 - 0.2) | 0.1 (0.1 - 0.2) | 0.1 (0.1 - 0.1) | 0.1 (0.1 - 0.1) | 0.1 (0.1 - 0.1) |
| Other | 0.5 (0.4 - 0.5) | 0.4 (0.4 - 0.5) | 0.7 (0.6 - 0.8) | 0.6 (0.5 - 0.6) | 0.6 (0.5 - 0.7) | 0.9 (0.8 - 1) |

## 2.3 Sensitivity analysis on direct contacts only

Direct contacts are the most commonly used definition for social contacts2,7,12 and, compared to a definition of social contacts that also includes indirect contacts, they always consist of a smaller number of face-to-face encounters. In this section, we provide results for the analysis using direct contacts only. Also in this case, the statistical analysis reaffirms the importance of in-person attendance in determining a higher number of social contacts (Figure SI8). Mixing patterns for direct contacts are similar to the main analysis, except for the significantly lower numbers of social contacts and higher values of assortativity in younger age groups (Figure SI9). Transmissibility results featured minor changes across all explored scenarios when compared to the main analysis (Figure SI10).

### Modelling the determinants of direct social contacts

**Figure SI8:** *Model results for the direct social contacts of the adult population.* Each panel in the figure shows the rate ratio for the number of direct social contacts in the adult population for each of the model’s covariates.

### Social contacts matrices for direct contacts

**Figure SI9:** *Contact matrices for direct-only social contacts*. A) Overall direct contacts, B) Contacts of respondents who attended in-person work or school activities, C) Contacts of respondents who did not attend work/school in-person.

### Reduction in transmissibility using direct contacts only

**Figure SI10:** *Effectiveness of in-person school and work closures in reducing viral transmissibility in the sensitivity analysis considering direct contacts only.* The Figure shows the relative reduction in transmissibility associated with intervention scenarios combining different levels of school closures and in-person work, compared to a baseline scenario where the proportion of in-person workers is set at pre-pandemic levels6 and students across all education levels attend in person.

## 2.4 Sensitivity analysis for social contacts under scenario 1B

This section is devoted to presenting the same analyses under scenario 1B for the augmentation of indirect social contacts, where indirect contacts are assumed to occur in the setting where most of the direct contacts occurred (see Section SI1.2). In this scenario, the total number of contacts does not change; therefore, the statistical model in this scenario remains unaltered. Contacts show similar mixing patterns as in the main analysis but with higher assortativity (Figure SI11), particularly for the younger age groups. Transmissibility results featured minor changes across all explored scenarios when compared to the main analysis (Figure SI12).

### Social contacts matrices for scenario 1B

### Figure SI11: *Contact matrices for social contacts under scenario 1B assumptions.* A) Overall direct and indirect 1B social contacts, B) Contacts of respondents who attended in-person work or school activities, C) Contacts of respondents who did not attend work or school activities in-person.

### Reduction in transmissibility for scenario 1B

**Figure SI12:** *Effectiveness of in-person school and work closures in reducing viral under scenario 1B assumptions*. The Figure shows the relative reduction in transmissibility associated with intervention scenarios combining different levels of school closures and in-person work, compared to a baseline scenario where the proportion of in-person workers is set at pre-pandemic levels6 and students across all education levels attend in person.

## 2.5 Using responses from the 2023 wave only

In the main manuscript analysis, we leveraged the statistical power of both waves to provide a more precise contact pattern description with an age stratification in groups of 5 years. In this section, we provide additional evidence that the differences between the contact patterns when leveraging data from the 2023 wave only, compared to pooling both waves together, do not show substantial differences in terms of the average number of social contacts by age-group and by in-presence attendance. Figure SI13 shows the differences between contact matrices computed using only data from the 2023 wave and those from both waves (as in the main analysis). Minimal differences exist both in the number of contacts and in the assortativity estimates. Note that when only employing 2023 wave data some elements of the “not in-presence” matrix have missing values. This does not occur in the case of pooled contact data.

**Figure SI13:** *Differences between contact matrices computed using wave 2 vs, both waves under scenario 1A assumptions.* A) Overall direct and indirect social contacts, B) Contacts of respondents who attended in-person work or school activities, C) Contacts of respondents who did not attend work or school activities in person. Grey squares show elements without any contact information available for the 2023 wave data. The top panels show the average difference in the number of reported social contacts. Shaded areas show the 95% C.I. computed through 1000 bootstrap iterations.

## References

1. Statistics | Eurostat. https://ec.europa.eu/eurostat/databrowser/view/demo_pjan__custom_10594040/default/table.

2. Mossong, J. *et al.* Social Contacts and Mixing Patterns Relevant to the Spread of Infectious Diseases. *PLOS Medicine* **5**, e74 (2008).

3. Trentini, F. *et al.* Investigating the relationship between interventions, contact patterns, and SARS-CoV-2 transmissibility. *Epidemics* **40**, 100601 (2022).

4. Pupils and students - enrolments (educ_uoe_enr). https://ec.europa.eu/eurostat/cache/metadata/en/educ_uoe_enr_esms.htm.

5. International Standard Classification of Education (ISCED). https://uis.unesco.org/en/topic/international-standard-classification-education-isced (2017).

6. Marziano, V. *et al.* Retrospective analysis of the Italian exit strategy from COVID-19 lockdown. *Proceedings of the National Academy of Sciences* **118**, e2019617118 (2021).

7. Verelst, F. *et al.* SOCRATES-CoMix: a platform for timely and open-source contact mixing data during and in between COVID-19 surges and interventions in over 20 European countries. *BMC Med* **19**, 254 (2021).

8. WHO chief declares end to COVID-19 as a global health emergency | UN News. https://news.un.org/en/story/2023/05/1136367 (2023).

9. Tizzani, M. *et al.* Impact of tiered measures on social contact and mixing patterns of in Italy during the second wave of COVID-19. *BMC Public Health* **23**, 906 (2023).

10. EpiPose. *ISI Foundation* https://www.isi.it/project/epipose/.

11. Funk, S. *et al.* socialmixr: Social Mixing Matrices for Infectious Disease Modelling. (2024).

12. Coletti, P. *et al.* CoMix: comparing mixing patterns in the Belgian population during and after lockdown. *Sci Rep* **10**, 21885 (2020).

# 3. Social contact survey: English translation

| **Social Contacts Patterns – Italy, March2022 and March2023** | |
| --- | --- |
| **Country** | Italy | |
| **Subject** | Social contacts mixing patterns | |

| #Demographic info |
| --- |

Adult Respondent (18+yo)

| Info | PDL VARIABLE |
| --- | --- |
| Date |  |
| gender | gender |
| Age | age |
| Province | GeoPC_Region2_it |
| Education | education_EN |
| Occupation | workstatus_EU |

Child Respondent (0-17 yo)

| Info | PDL VARIABLE |
| --- | --- |
| Date |  |
| gender | [childgenders_EU_1](https://datum.yougov.net/namespaces/panel:152/definitions/childgenders_EU_1/) to [childgenders_EU_5](https://datum.yougov.net/namespaces/panel:152/definitions/childgenders_EU_5/) |
| Age | child_ages_mc_2019_EU (computed PDL) |
| Occupation | workstatus_EU =if childage>=16 |

NOTES:

- Whenever questions have “# **Receiver if not adult: parent** ”, please insert a warning message in bold-red to let the respondent understand the question is being asked to the parent not the child.
  Warning message if childage=0to13: “ **This question is about you as a parent or guardian of the minor** ”, Warning message if childage=14to17: **“ This question is about $pipein [“your mom”, if gender=2, “your dad” if gender=1], please let $pipein [“she”, if gender=2, “he” if gender=1] answer it”**
- Whenever respondent_type=1 and “# **Receiver if not adult IS NOT parent** ”, we need another warning message (in bold blue color), as follows: “This question concerns [“your child” if childgender=1] [“your daughter” if childgender=2] [$pipe-in:childage] years old”
- Added a warning message:
  whenever respondent_type **=2** (receiver aged 14-17) (and “# **Receiver if not adult IS NOT parent** ”, we need another warning message (in bold blue color), as follows: “This question is about you, [“child” if childgender=1] [“daughter” if childgender=2] of [$pipe-in:childage] years as a recipient of this survey”
- Adapt age-specific and gender-specific wording:
  Age_gender: wording change: from “Are you…?” to “What is your sex?”

| #Questionnaire START (FOR RECONTACTS) |
| --- |

[TEST MODE VARIABLE]: based on who we're inviting to answer

[respondent_type] respondent

1. 0-13 yo (via parent)
2. 14-17 yo (kids survey)
3. Adult (18+)

*# toscripting, INTRO TEXT 1. show only recontacted respondents from wave 1*# **respondent_type=3 (adult 18+) version**

*Dear respondent,*

*in March 2022 you were kind enough to respond to a survey conducted by the Bruno Kessler Foundation (Trento) and Bocconi University, on the topic of health.*

*We would greatly appreciate your participation in a second phase of the research and therefore ask you to be available to take part in this new survey. The questions will be the same, precisely because the purpose of the research is to understand if and how people's behaviour evolves over time.*

Click on “>” to proceed

_______________________________________________________________________________

*#toscripting, INTRO TEXT 1. show only recontacted respondents from wave 1*# **respondent_type=1 (0-13yo kid) version**

*Dear respondent,*

*in March 2022 you were kind enough to answer a survey* ***together******to [pipe-in: “your son” if childgender=1 or “your daughter” if childgender=2] (or acting on his behalf), who at the time of completion was [pipe-in number from childage] years old*** *. The survey , on the topic of health, was conducted by the Bruno Kessler Foundation (Trento) and Bocconi University.*

*We would greatly appreciate your participation in the second phase of the research. We would therefore like* ***to reinvite*** *you and* ***[pipe-in: “your son” if childgender=1 or “your daughter” if childgender=2]******a of $pipein* [childage] *years (as of March 2022)*** *, if possible, to take part in the survey. The questions will be the same, precisely because the purpose of the research is to understand if and how people's behaviour evolves over time.*

We will be asking for $pipe1_kid_gender's opinion on a variety of health-related topics. Many of the questions will be directly about $pipe1_kid_gender, while others will be about you as a parent/guardian. To make it easier to distinguish, [ *red colour*: “questions about you will be marked in red”], while [ *blue colour*: “questions about [pipe-in: “him” if childgender=1, “her” if childgender=2] will be marked in blue”]

***We invite you, if possible, to complete the questionnaire with his/her assistance (where necessary).***

You will be the one to answer, acting as <b>pipe-in: “your son” if childgender=1, “your daughter” if childgender=2] of $pipein [childage] years</b>.

In addition to requesting your consent to proceed, we also need $pipe1_kid_gender to have the will to participate. For this reason, we have created a privacy notice ADD PRIVACY NOTICE that informs you about what we will ask for and how we will use the information.

Click on “>” to proceed

_______________________________________________________________________________

*#toscripting, INTRO TEXT 1. show only recontacted respondents from wave 1*# **respondent_type=2 (14-17yo kid) version**

*Dear respondent,*

*a few months ago, you and* ***[pipe-in: “your son” if childgender=1 or “your daughter” if childgender=2] of [pipe-in number from childage] years old at the time of filling out the form*** *were kind enough to respond to a survey on the topic of health conducted by the Bruno Kessler Foundation (Trento) and Bocconi University.*

*greatly appreciate your participation in the second phase of the research.* We would therefore like to **invite** you and [pipe-in: “your son” if childgender=1, “your daughter” if childgender=2] of $pipein [childage] years (in March 2022) to take part in the survey. *The questions will be the same, precisely because the aim of the research is to understand if and how people's behaviour evolves over time.*

<b><u>Many of the questions will be addressed directly to $pipe1_kid_gender </b></u>, ***we encourage you to give*** [pipe-in: “ ***your son*** ” if childgender=1, “ ***your daughter*** ” if childgender=2] ***your smartphone/computer/tablet*** directly and have [pipe-in: “him” if childgender=1, “her” if childgender=2] fill out the questionnaire directly.

Some questions will, however, be directed at you as a parent or guardian, so we ask that you remain with $pipe1_kid_gender throughout the entire survey.

To make it easier to distinguish, [ *blue colour*: questions regarding [pipe-in: “your son” if childgender=1, “your daughter” if childgender=2] will be marked in blue], while [ *red colour*: “those regarding you as a parent will be marked in red”].

In addition to requesting your consent to proceed, we also need $pipe1_kid_gender to have the will to participate. For this reason, we have created a privacy notice [ADD PRIVACY NOTICE image link] which informs you about what we will ask for and how we will use the information.

Click on “>” to proceed

| # Questionnaire START (FOR FRESH RESPONDENTS) |
| --- |

[TEST MODE VARIABLE]: based on who we're inviting to answer

[respondent_type] respondent

1. 0-13 yo (via parent)
2. 14-17 yo (kids survey)
3. Adult (18+)

#TOSCRIPTING: please create another test mode variable where you exactly indicate age (or childage), gender (or child gender), region of the respondent

#TOSCRIPTING: AS 0-13YO RESPONDENT SURVEY WILL BE handles via “Lingua” (parents are asked to answer about their children rather than on themselves), we need a test mode variable that tells us the “child receiver” **gender** . As there will be two languages: one for males 0-13 the other for females 0-13, as Italian language differentiates genders, we need to avoid using slashes “figlio/a” (that means son/daughter).

#Question type: INTERLUDE TEXT FOR **CHILDREN (AGED 0-13) -> this will be shown if respondent_type = 1**

You recently told us that you have [pipe-in: “a son” if childgender=1, “a daughter” if childgender=2] aged $pipein [childage] years living in your household.

We are conducting a survey where we will ask $pipe1_kid_gender's opinion on a range of health-related topics. We would like to invite you and [pipe-in: “your son” if childgender=1, “your daughter” if childgender=2] aged $pipein [childage] to take part in the survey. Many of the questions will directly concern $pipe1_kid_gender, while others will concern you as a parent/guardian. To make it easier to distinguish, [ *red colour*: “questions about you will be marked in red”], while [ *blue colour*: “questions about [pipe-in: “him” if childgender=1, “her” if childgender=2] will be marked in blue”]

***We invite you, if possible, to complete the questionnaire with his/her assistance (where necessary).***

You will be the one to answer, acting as <b>pipe-in’s representative: “your son” if childgender=1, “your daughter” if childgender=2] aged $pipein [childage] years</b>.

In addition to requesting your consent to proceed, we also need $pipe1_kid_gender to have the will to participate. For this reason, we have created a privacy notice ADD PRIVACY NOTICE image link]that informs you about what we will ask for and how we will use the information.

# BASED ON CHILD GENDER
PRIVACY LINK TO BE PROVIDED

#Question type: INTERLUDE TEXT FOR **CHILDREN (AGED 14-17) -> this will be shown if respondent_type = 2**

You recently told us that you have a [pipe-in: “a son” if childgender=1, “a daughter” if childgender=2] aged $pipein [childage] years living in your household.

We are conducting a survey where we will ask $pipe1_kid_gender's opinion on a variety of health-related topics.

We would like to invite you and [pipe-in: “your son” if childgender=1, “your daughter” if childgender=2] aged $pipein [childage] to take part in the survey. <b><u>Many of the questions will be directed to $pipe1_kid_gender </b></u>, ***we encourage you to hand your smartphone/computer/tablet directly to*** [pipe-in: “ ***your son*** ” if childgender=1, “ ***your daughter*** ” if childgender=2] and have [pipe-in: “him” if childgender=1, “her” if childgender=2] fill out the questionnaire.

Some questions will, however, be directed at you as a parent or guardian, so we ask that you remain with $pipe1_kid_gender throughout the entire survey.

To make it easier to distinguish, [ *blue colour*: questions regarding [pipe-in: “your son” if childgender=1, “your daughter” if childgender=2] will be marked in blue], while [ *red colour*: “those regarding you as a parent will be marked in red”].

In addition to requesting your consent to proceed, we also need $pipe1_kid_gender to have the will to participate. For this reason, we have created a privacy notice [ADD PRIVACY NOTICE image link] which informs you about what we will ask for and how we will use the information.

| # Child1417_presence (both for fresh and recontacts) – only respondent_type=2 |
| --- |

#Base: Children aged 14-17 yo

#Filter: childage =14to17

#Receiver if not adult: parent

#Question type: single

[child1417_presence] Are you available and willing on the part of [pipe-in: “your son” if childgender=1, “your daughter” if childgender=2] aged $pipein [childage] to participate in this survey?
*Please select one response only* .

1. Yes, [pipe-in: “my son” if childgender=1, “my daughter” if childgender=2] is available to answer the survey now.
2. Yes, but [pipe-in: “my son” if childgender=1, “my daughter” if childgender=2] CANNOT answer the survey now
3. No, I don't want [pipe-in: “my son” if childgender=1, “my daughter” if childgender=2] to answer the survey.

#TOSCRIPTING: screenout if child1417_presence=3, go to page “notthere” if child1417_presence=2

#Base: Children aged 14-17 yo

#Filter: childage =14to17 and child1417_presence=2

#Receiver if not adult: parent

#Question type: interlude page

[notthere] You said that [pipe-in: “your son” if childgender=1, “your daughter” if childgender=2] from $pipein [childage] is not currently present (or unavailable to respond). You can resume the survey when [pipe-in: “your son” if childgender=1, “your daughter” if childgender=2] is available by clicking the invitation link you received by email, which will take you back to this page.
Remember to read the privacy notice and when [pipe-in: “your son” if childgender=1, “your daughter” if childgender=2] is available to respond, click the “ > ” arrow at the bottom.
*Select only one answer* .

“ > ” continue button

| #INTRO TEXT FOR ALL |
| --- |

#Question type: INTERLUDE TEXT **FOR ALL**

Dear respondent,

#skip this paragraph if respondent=recontact

in the context of a research project carried out by the Bruno Kessler Foundation (Trento) and Bocconi University (Milan) we are conducting a survey on the topic of health.
The aim of the research is to deepen our knowledge of the interactions between people that carry the transmission of infectious diseases.


<br/>You will be credited $points points for completing the survey.<br/>We have tested the questionnaire and it takes on average about $time_var minutes to complete.

If necessary, you can interrupt the questionnaire and resume later.<p></p><b>The questionnaire is completely anonymous and you will NOT be identified IN ANY WAY</b> [#t **oscripting** : rewording of this sentence from “the questionnaire” to “identified” for **respondent_type=1** : “The questionnaire is completely anonymous and neither you nor $pipe1_kid_gender will be identified IN ANY WAY”]. Please complete the entire questionnaire, including the questions that help us better understand your profile. The success of the research depends on the completeness of the answers given by each individual respondent.<p></p>Your contribution is greatly appreciated! We thank you very much for participating in our survey.

#TOSCRIPTING: show if respondent_type=3

<i>We will take all precautions to ensure that your anonymity is preserved during every phase of the research. Further information is available on the <a href="…" target="_blank">privacy and cookies notice</a> page. <br/><br/>

By clicking “>” you confirm that you wish to participate in the survey. </i><br/><br/>

| #Module 1A: Socio- demographic questions |
| --- |

#Base: 0-5 yo

#Filter: if childage =0to5

#Receiverif​ not adult : parent

#Question type: single

#alternativetextif​ childage =5 “[pipe-in: “Your child” if childgender =1, “Your daughter” if childgender =2] of $ pipein [ childage ] years goes to kindergarten or school? ”

[occupation_05] [pipe-in: “Your son” if childgender=1, “Your daughter” if childgender=2] of $pipein [childage] years old goes to kindergarten (daycare or preschool)?

1. Yes
2. No

#Base: All

#Filter:

#Receiver if not adult: child if respondent_type = 2 (and childage = 16,17), parent if respondent_type =1 or if respondent_type =2 (and childage =14,15). Adult him/ herslef if receiver_type =3.,
if respondent_type_LF =2 -> In case of respondent_type =2 (and childhood =14,15), “ Warning message if childage=14to17” needs to appear as per word page 1 instructions
if respondent_type =2 and childage =16,17 insert blue bold warning message “This question concerns you, [“child” if childgender=1] [“daughter” if childgender=2] of [$pipe-in:childage] years old as the recipient of this survey”
if respondent_type =2 and childage =16,17 AND code selected IS NOT 5: display warning message: “You are under 18 years old and have stated that he or she does not attend school . This answer is plausible, but please review it to ensure it is accurate. Please check your answer and continue.”

#Question type: single

#code 4 amend Italian wording (without ending point): “I am a househusband, I take care of the family”

#if RESPONDENT=RECONTACT pre-fill the answer option with wave 1 code selection and pipe-in text below all question text (bold and underscored): “A few months ago you selected the answer below, if it is still valid, continue without changing your answer, otherwise change it by selecting the relevant option”

**#TOSCRIPTING: INSERT PDL “ workstatus_EU ” and rename it [occupation]
Type in the question wording of pdl, please amend: “Which of these options best describes your employment situation?”**

[**employment**] {single varlabel ="work status"} Which of these BEST applies to you

<1>Working full time (30 or more hours per week) including temporarily off work

<2>Working part-time (8 to 29 hours per week) including temporarily off work

<3>Working part-time (less than 8 hours a week including temporarily off work)

<4>Looking after the home or family

<5>Full-time education

<6>Part time Student (working more than 30 hours per week)

<7>Part time Student (working less than 30 hours per week)

<8>Retired from paid work

<9>Unemployed

<10>Not working due to long term illness/incapacity/disability

<11>Not working for other reasons

<96> Other

#Base: Employed 16+ yo

#Filter: if occupation = (or)1,2,3,6,7 (deleted code 4) and age or childage >=16

#Receiver if not adult: child (if childage >=16), parent if childage <=15, if respondent_type_LF =2
if respondent_type =2 and childage =16,17 insert blue bold warning message “This question is about you, [“child ” if childgender=1] [“daughter”if childgender=2] of [$pipe-in:childage] years old as the recipient of this survey”

#Question type : single#if RESPONDENT=RECONTACT pre-fill the answer option with wave 1 code selection and pipe-in text below all question text ( bold and underscored ): “A few months ago you selected the answer below, if it is still valid, continue without changing your answer, otherwise change it by selecting the relevant option”

[ occupation_category ] Which job category best describes your primary occupation?
*Select one answer.*

1. Agriculture, livestock, fishing and forestry
2. Hotel and catering
3. Administrative and service support activities
4. Arts, Entertainment and Recreation
5. Activities of non-territorial bodies and organisations
6. Domestic work activities
7. Real estate activities
8. Scientific-technical professional activities
9. Wholesale and retail trade, repair of motor vehicles and motorcycles
10. Construction
11. Mining and quarrying, mining industry
12. Finance and insurance
13. Computer science and communication
14. Instruction
15. Logistics, transport and storage
16. Manufacturing
17. Public Administration, Defense, Compulsory Social Security
18. Electricity, gas, steam and air conditioning resources
19. Water resources, sewerage, waste management and remediation activities
20. Health and social services
21. Other services

<955 fixed > Other occupation not listed above [SPECIFY]

#Base: Total

#Filter:

#Receiver if not adult: parent if respondent_type_LF =2 ->

#Question type: please insert “ education_IT ” pdl

#if RESPONDENT=RECONTACT pre-fill the answer option with wave 1 code selection and pipe-in text below all question text ( bold and underscored ): “A few months ago you selected the answer below, if it is still valid, continue without changing your answer, otherwise change it by selecting the relevant option”

[instruction]

#TOCLIENT: we insert our database variable that will be recoded as per request into [middle school diploma or less, high school diploma, degree or more]

#TOSCRIPTING: education =1 'lower' if education_level_IT =1,2,3; education =2 'mid' if education_level_IT =4,5,6, education =3 'higher' if education_level_IT =7to12, education =4 'other/no answer' if education_level_IT =13,14

[ education_level_it ] {single} What is the highest level of education or qualification you have achieved?

<1> No diploma

<2> Elementary school diploma

<3> Middle school diploma

<4> High School Diploma

<5> Apprenticeship Diploma

<6> Technical Institute

<7> Bachelor's Degree

<8> Single-cycle master's degree

<9> Old system degree

<10> First level Master

<11> Specialist degree/ Master's degree

<12> Doctorate / second level master's degree

<13> Other

<14> I prefer not to answer

#Base: Total

#Filter:

#Receiverif​ not adult : parent

#Question type: Single
#if RESPONDENT=RECONTACT pre-fill the answer option with wave 1 code selection and pipe-in text below all question text ( bold and underscored ): “A few months ago you selected the answer below, if it is still valid, continue without changing your answer, otherwise change it by selecting the relevant option”

[income] FAMILY income is the combined income of all earners in a household from all sources (including wages and annuities). What is the NET monthly household income (i.e. excluding taxes) of your household?

*If you live with people who are not part of your household, exclude them from the calculation.*

*Select one answer only.*

1. < EUR 1,000
2. EUR 1,000-1,499
3. EUR 1,500-1,999
4. EUR 2,000-2,499
5. EUR 2,500-2,999
6. EUR 3,000-3,499
7. EUR 3,500-3,999
8. EUR 4,000-4,999
9. > EUR 5,000

<933>I prefer not to answer

#Base: Total

#Filter:

#Receiver if not adult: if childage between 0 and 13: parent - if childage between 14 and 17: child
if respondent_type = 2 insert blue bold warning message “This question is about you, [“son” if childgender=1] [“daughter”if childgender=2] aged [$pipe-in:childage] as the recipient of this survey”

#Question type : Single

[ perceived_income ] From 1 to 5, what level of economic well-being would you place yourself in compared to the Italian population?
*Select only one answer.*

1. 1= very low well-being
2. 2 = low well-being
3. 3 = average well-being
4. 4 = high well-being
5. 5 = very high well-being

<933>I prefer not to answer

#to scripting: BEFORE ASKING ANY QUESTION ON COHABITANTS (ie before profile_household_size_EU ), we need a complex pipe in exercise in order to remind the respondents their cohabitants (as stated by themselves in wave 1)

Please show a page with the below text (it means “you declared in March 2022 you live with…”

#Base: Total

#Filter:

#Receiver if not adult: child if respondent_type =2, adult if respondent_type =1

#Question type: MULTIPLE

[coviventi_check]The people listed below are those you declared you were living with in March 2022. Please read carefully and answer the following question:

#[show a list where you pipe-in age (coviventi_eta) and c_coviventi_name]

#list example below:

John of 8 yo

Wife of 45 yo

….

Do you still live with all of the above people? *Select the appropriate option(s).*

<1>Yes, there have been no changes [EXCLUSIVE] [IF SELECTED SKIP ALL THE COHABITANS QUESTIONS]

<2>One or more of the above persons no longer live with me

<3>I live with one or more new people [if selected GO TO….]

<4>None of the above people are my cohabitants anymore [EXCLUSIVE] [IF SELECTED ASK ALL THE COHABITANTS QUESTIONS]

#Base: Who has at least one less cohabitant

#Filter: if [ cohabitants_ check ]= 2

#Receiver if not adult: child if respondent_type =2, adult if respondent_type =1

#Question type : multiple - required soft

[cohabitants_check_2] Which of the following people <b>NOT</b> live with you anymore? *Select all that apply.
If you made a mistake in the previous question and all the people below still live with you, proceed without selecting any people.*

#[show a list where you pipe-in age (conviventi_eta) and c_coviventi_name] and make multiple answer options selectable
# 🡪cohabitants that were selected in conviventi_check_2 will have to be removed from c_conviventi (ie they should not be considered cohabitants anymore)

#Base: Who has at least one more cohabitant

#Filter: if [ cohabitants_ check ]= 3

#Receiver if not adult: child if respondent_type =2, adult if respondent_type =1

#Question type : single - required soft

[conviventi_check_3] How many new people do you live with in addition to those listed below? *Select only one answer option.
If you made a mistake in the previous question and do not live with any new people, proceed without selecting an answer.*

#[show a list where you pipe-in age (conviventi_eta) and c_coviventi_name] – NOT SELECTABLE

1. 1
2. 2
3. 3
4. 4
5. 5

# 🡪if code1,2,3,4,5 is selected re-ask conviventi_eta and conviventi_name just for the new cohabitants (1,2,3,4 or 5 depdenting on code selected in conviventi_check_3)
# 🡪after the respondent will have indicated these new cohabitans age (conviventi_eta) and name (conviventi_name) they have to be added to c_conviventi list (ie added to the new cohabitants list)

COMPUTE A VARIABLE [CONVIVENTI_excl_parentANDunderage] THAT IS =

[PARTNERS] number (excl code 98 and 95) – [profile_household_child_respon_EU] number (code number -1, up to code 6 only) – 1 (parent him/herself)

#Base: 0-13yo

#Filter: if cohabitants >1 AND respondent_type =1

#Receiver if not adult: PARENT (SHOW WARNING MESSAGE)

#Question type: single grid

#TOSCRIPTING: valid for “conviventi_eta_013yo to conviventi_eta_18+”, client noticed that a pipe-in is in place not only for rows _0 and _1 (or just for row _0 in conviventi_eta_18+), but also for other possible children (take from childhoods pdl) . That could be ok, and facilitate respondents answer, BUT as of now we have some “bug”: eg A parent has two underage children and lives in a household of 5 people including him/herself: now have two pipes-in (for the underage children) and three empty spaces. We should now have 3 pipes-in (1 is the parent, 2 are for the underage children)

[conviventi_eta_013yo] How old are the people you live with?
*Select an answer for convivente.*pipes-in info (not counted in rows)

| You pipe-in VISIBLE to respondent: this is age from parent panellist years  “Your son involved in this survey/Your daughter involved in this survey” (according to [childgender]=1 or 2 of **receiver** ) + pipe in from [childage] – visible to respondent if cohabitants>1 years  “Your son/daughter” [pipe-in [childage]], as many pipe-in here as we have in profile_household_child_respon_EU (-1 of the child receiver) |
| --- |
| **-[cohabitants_age_013yo_1** ] Other cohabitant as many rows (_2, _3 and so on) a the number of this computed variable [CONVIVENTI_excl_parentANDunderage] |

[open integer] (min 0 max 110)

#Base: 14-17yo

#Filter: if cohabitants >1 AND respondent_type =2

#Receiver if not adult: child
if respondent_type = 2 insert blue bold warning message “This question is about you, [“son” if childgender=1] [“daughter”if childgender=2] aged [$pipe-in:childage] as the recipient of this survey”

#Question type: single grid

[conviventi_eta_1417yo] How old are the people you live with?
*Select an answer for cohabitant.*

pipes-in info (not counted in rows)

| You pipe-in VISIBLE to respondent: this is age from parent panellist years  “Your father involved in this survey/Your mother involved in this survey” (according to [childgender]=1 or 2 of **receiver** ) + pipe in from [childage] – visible to respondent if cohabitants>1 years  “Your brother/sister/partner” [pipe-in [childage]], as many pipe-in here as we have in profile_household_child_respon_EU (-1 of the child receiver) |
| --- |
| **-[cohabitants_age_1417yo_1]** Other cohabitant​ as many rows (_2, _3 and so on) a the number of this computed variable [CONVIVENTI_excl_parentANDunderage] |

[open integer] (min 0 max 110)

#Base: adults 18+

#Filter: if cohabitants >1 AND respondent_type =3

#Receiver if not adult:

#Question type: single grid

#TOSCRIPTING: pipes-in for underage children ( childage pdl)

apply here too

[cohabitants_age_18+] How old are the people you live with?
*Select an answer for cohabitant.*

pipes-in info (not counted in rows)

| You pipe-in VISIBLE to respondent: this is age from parent panelist years  “Your son/daughter” [pipe-in [childage]], as many pipe-in here as we have in profile_household_child_respon_EU |
| --- |
| **-[cohabitants_age_18+_1]** Other cohabitant​ as many rows (_2, _3 and so on) a the number of this computed variable [CONVIVENTI_excl_parentANDunderage] |

[open integer] (min 0 max 110)

#Base: Total

#Filter: if aft least one “Other cohabitant” is shown in conviventi_eta_xxx question

#Receiverif​ not adult: PARENT if respondent_type =1, child if respondent_type =2
if respondent_type = 2 insert blue bold warning message “This question concerns you, [“son” if childgender=1] [“daughter”if childgender=2] aged [$pipe-in:childage] as the recipient of this survey”

#Question type: open text boxes

[c_coviventi_name] Enter the name of each cohabitant listed below. Only one name per box .
*You do not need to enter their real name; it can also be a nickname that will help you distinguish these people in the next phase of the questionnaire.*

[in rows]: as many rows as “Other cohabitant” as we have in conviventi_eta_xxx question
[pipe-in: name wording from conviventi_eta_xxx] + “di” + “pipes-in: age from conviventi_eta” + “anni”

[In columns]: open text boxes

**#toscripting: c_conviventi_name (as written in open boxes here) will have to appear in closed to c_vaccino questions as it happens for names that are filled in c_home to c_otheroutdoor questions:
Note : please update on timing**

| #Module 1B: Health and covid questions |
| --- |

*#to scripting, changed 4 questions order:* ***THESE are TO BE KEPT AT THE END after income received***

*- implicit_acute_pathologies*

*- implicit_chronic_pathologies*

*- implicit_pathologies_acute_cohabitant*

*- implicit_patologies_croniche_cohabitant*

#Base: Total

#Filter:

#Receiverif​ not adult: child - if respondent_type_LF =1 ->
if respondent_type = 2 insert blue bold warning message “This question concerns you, [“son” if childgender=1] [“daughter”if childgender=2] aged [$pipe-in:childage] as the recipient of this survey”

#Question type: multiple, randomize rows – skip option health

[ acute_pathologies ] Are you currently experiencing one or more of the following symptoms?
*Select all that apply.*

1. No clinical condition fixed and exclusive (please note: delete former code 2: no clinical condition, that was reapeted from code 1)
2. Chills
3. General weakness
4. Diarrhea
5. Difficulty breathing
6. Fever (37.5°C or higher)
7. Sore throat
8. Muscle ache
9. Loss of taste
10. Loss of smell
11. Pneumonia
12. Confusional state or delirium
13. Cough
14. Vomit

<955 fixed >Other clinical conditions

#Base: Total

#Filter:

#Receiverif​ not adult: child, if respondent_type_LF =1 ->
if respondent_type = 2 insert blue bold warning message “This question concerns you, [“son” if childgender=1] [“daughter”if childgender=2] aged [$pipe-in:childage] as the recipient of this survey”

#Question type: multiple, randomize rows – skip option health

[ chronic_pathologies ] Indicate if you have one or more of the following pathologies or are in one of the following conditions?
*Select all that apply.*

1. No pathology fixed and exclusive
2. Alcohol or other drug abuse shown if respondent_type = 2,3
3. Other immunodeficiencies (e.g. transplant patient, long-term use of immunosuppressant drugs) fixed above code 955
4. Sickle cell anemia or thalassemia
5. Heart conditions (e.g., heart failure, coronary artery disease, cardiomyopathy, or hypertension)
6. Neurological conditions
7. Diabetes (type 1 or type 2)
8. Smoker shown if respondent_type = 2.3
9. Pregnancy fixed above code 955 – show if : gender=2(female) and if respondent_type = 3
10. Stroke or cerebrovascular disease
11. HIV/AIDS infection
12. Chronic liver disease
13. Chronic kidney disease
14. Chronic lung diseases (e.g. COPD, asthma, cystic fibrosis, etc.)
15. Overweight and obesity
16. Tumors

<955 fixed >Other clinical conditions

#Base: Who lives with someone

#Filter: if cohabitants>1

#Receiver if not adult: parent - if respondent_type_LF =1 -> child if respondent_type_LF =2 (rewording not needed)
no blue warning here for resp type=1,2

#Question type: multiple, randomize rows – skip option health
#toscripting: we miss underline in cohabitant

[ pathologies_acute_cohabitant ] Indicate whether at least one of your cohabitants has one or more of the following symptoms these days.
*Select all that apply.*

1. No clinical condition fixed and exclusive
2. Chills
3. General weakness
4. Diarrhea
5. Difficulty breathing
6. Fever (37.5°C or higher)
7. Sore throat
8. Muscle ache
9. Loss of taste
10. Loss of smell
11. Pneumonia
12. Confusional state or delirium
13. Cough
14. Vomit

<955 fixed >Other clinical conditions

<977 fixed >I don't know

#Base: Who lives with someone

#Filter: if cohabitants>1

#Receiver if not adult: parent - if respondent_type_LF =1 -> child if respondent_type_LF =2 (rewording not needed)
no blue warning here for resp type=1,2

#Question type: multiple, randomize rows – skip option health

[ cohabitant_chronic_pathologies ] Indicate whether at least one of your cohabitants has one or more of the following pathologies or is in one of the following conditions.
*Select all that apply.*

1. No pathology fixed and exclusive
2. Abuse of alcohol or other drugs
3. Other immunodeficiencies (e.g. transplant patient, long-term use of immunosuppressant drugs) fixed above code 955
4. Sickle cell anemia or thalassemia
5. Heart conditions (e.g. heart failure, coronary artery disease, cardiomyopathy, or hypertension)
6. Neurological conditions
7. Diabetes (type 1 or type 2)
8. Smoker
9. Pregnancy fixed above code 955
10. Stroke or cerebrovascular disease
11. HIV/AIDS infection
12. Chronic liver disease
13. Chronic kidney disease
14. Chronic lung diseases (e.g. COPD, asthma, cystic fibrosis, etc.)
15. Overweight and obesity
16. Tumor

<955 fixed >Other pathologies

<977 fixed >I don't know

#Base: Total

#Filter

#Receiverif​ not adult: child , if respondent_type_LF =1 ->
if respondent_type = 2 insert blue bold warning message “This question concerns you, [“son” if childgender=1] [“daughter”if childgender=2] aged [$pipe-in:childage] as the recipient of this survey”

#Question type: single – skip option health

[covid] Have you ever contracted COVID-19, diagnosed by antigen or molecular swab?
*Select only one answer.*

1. Yes
2. No, never

#Base: Who has been diagnosed with COVID

#Filter: if covid=1

#Receiverif​ not adult: child, if respondent_type_LF =1 ->
if respondent_type = 2 insert blue bold warning message “This question concerns you, [“son” if childgender=1] [“daughter”if childgender=2] aged [$pipe-in:childage] as the recipient of this survey”

#Question type: double dropdown menu – skip option health – dk option: “I don't remember”. Dates are in English, please put in Italian

[ covid_date ] When were you diagnosed with COVID-19?
*If you have had it multiple times, think about the last time. Select only one answer by clicking the box below.*

[FIRST DROP DOWN: **MONTHS+YEAR** FROM: March 2020 to SAME DAY OF INTERVIEW ]

[SECOND DROP DOWN: **DAY** , from 0 to 31 according to months (exclude numbers on relevant months) + Don't Know option ]

#Base: Who has been diagnosed with COVID

#Filter: if covid=1

#Receiverif​ not adult: child , if respondent_type_LF =1 ->
if respondent_type = 2 insert blue bold warning message “This question concerns you, [“son” if childgender=1] [“daughter”if childgender=2] aged [$pipe-in:childage] as the recipient of this survey”

#Question type: single – skip option health

[ covid_ospedale ] Have you <b> EVER </b> been hospitalized for COVID-19?
*Select one answer only.*

1. Yes
2. No, never

#Base: Total

#Filter:

#Receiverif​ not adult: child if kilometer =14,15,16,17, parent if childage =0to13
if respondent_type = 2 insert blue bold warning message “This question concerns you, [“son” if childgender=1] [“daughter”if childgender=2] aged [$pipe-in:childage] as the recipient of this survey”

#Question type: multiple, random order

[info] Which of the following media do you regularly use as a source of information?
*Select all that apply.*

1. Paper newspapers or magazines
2. Online newspapers or magazines (including apps and blogs)
3. Television
4. Radio (live)
5. Podcast or radio podcast
6. Instagram
7. Facebook
8. Twitter
9. Whatsapp (for example through “groups”)
10. Telegram
11. Tik Tok
12. YouTube

<955 fixed>Other (not listed above) [SPECIFY]

| #Module 2A: Questions about “YESTERDAY” |
| --- |

#TOSCRIPTING: we have to check if the day when respondent started the first question of module 2A is the same with the day when he answered the last question of module 2A, if it's different respondent is screened out.
#TOSCRIPTING: please create a test mode variable called [date_module2A] that will indicate the date in which those questions were answered.

#Interludetext: txt4

The next questions refer to events that happened YESTERDAY.

***We kindly ask you to complete the questions in this section today*** .

#TOSCRIPTING: made the above part bold – wording updated

| #Module 2A.1: Questions about “YESTERDAY” not related to contacts |
| --- |

#Base: Total

#Filter

#Receiverif​ not adult: child , if respondent_type_LF =1 ->
if respondent_type = 2 insert blue bold warning message “This question concerns you, [“son” if childgender=1] [“daughter”if childgender=2] aged [$pipe-in:childage] as the recipient of this survey”

#Question type: single – skip option health

[isolation] Yesterday, were you in…?
*Select one answer only.*

1. Fiduciary isolation (for positivity)
2. Self-surveillance (as per the legislative decree of 30 March 2022)
3. At home due to illness (but not in isolation due to positivity)
4. None of these options

#Base: Employed 16+ yo not in isolation/quarantine or on sick leave YESTERDAY

#Filter: if (employment = (or)1,2,3, ,6,7 (deleted code 4) and age or childage >=16) AND isolation != 1,3

#Receiver if not adult: child (if childage >=16)
if respondent_type = 2 insert blue bold warning message “This question concerns you, [“son” if childgender=1] [“daughter”if childgender=2] aged [$pipe-in:childage] as the recipient of this survey”

#Question type: single, randomize ($RAND=2)

[ presence_work ] What mode did you work in YESTERDAY?
*Select one answer only.*

1. I have worked exclusively remotely
2. I have worked entirely or partly in person
3. I didn't work yesterday #TOSCRIPTING: FIXED

#Base: Students not in isolation/quarantine or on sick leave YESTERDAY

#Filter: if [(age/ childage >=16 AND occupation = (or)5,6,7) OR childage =6to15 OR ( childage =0to5 AND occupation_05=1)] AND isolation !=1,3

date (new dates added):in case respondent type = 2 (14-17 yo )
date is 15 March to 20 March + 22 March to 27 March + 29 March to 03 April + 05 April to 10 April (Tuesdays to Sundays)

in case respondent type =1,3 (0-13yo or 18+) date is 15 March to 19 March + 22 March to 26 March + 29.03 to 02 April + 05 April to 09 April (Tuesdays to Saturdays)

#Receiver if not adult: child, if respondent_type_LF =1 ->
if respondent_type = 2 insert blue bold warning message “This question concerns you, [“son” if childgender=1] [“daughter”if childgender=2] aged [$pipe-in:childage] as the recipient of this survey”

#Question type: single randomize ($RAND=2)

[ presence_school ] What type of teaching did you do YESTERDAY?
*Select one answer only.*

1. Exclusively remotely (distance learning/DAD)
2. In whole or in part in presence
3. None (e.g. school/university was closed, I was sick) #TOSCRIPTING: FIXED

| #Module 2 A.2: Contact Flow |
| --- |

#TOSCRIPTING: question order: please leave c_home first, then randomize c_school and c_work as second, randomize other questions in third place, finally randomize c_other_indoor and c_other_outdoor in last place.

c_otherindoor, c_otheroutdoor, c_restaurant, transport, leisure: max 10 each

c_shopping, c_homeguest, c_home, c_work, c_school: max 20 each

#TOSCRIPTING: In any circumstances, for the questions **c_home to c_otheroutdoor** we need to NOT allow respondents to use a same exact name within the same questions and also between these questions. Eg we can never have a duplicate name like “John husband” twice.
I confirm this is required even if it's only applicable to same exact wording like “john” and “john”warning message in Italy n: “You have already written the name [pipe-in: duplicated name(s)] once. Please review your answer.”

#Question type: INTERLUDE TEXT if respondent_type_LF =1 ->

Now we will ask you some questions about the close contacts you had YESTERDAY .

Please read the following carefully.

A **CLOSE CONTACT** is defined as:

a) a **physical interaction** with another person (e.g. a handshake, a pat on the back, a hug, a kiss, etc.); or

b) an interaction with a **person** **physically present** in which at least **5 words are exchanged** (for example: “Hello!” “Hello!” “How are you?” “Good and you?”). In this case it is not necessary that there has been physical contact with the person.

#TOSCRIPTING: added bold in green parts
please create a drop-down box visible in each question from c_home to c_otheroutdoor question, to let the respondent take a second look, if they feel they need to, at the definition of “contact “CLOSE CONTACT” from this interlude
(ie “A CLOSE CONTACT is defined as:

a) a physical interaction you had with another person (e.g. a handshake, a pat on the back, a hug, a kiss, etc.); or

b) an interaction with a physically present person in which you exchanged at least 5 words (for example: “Hello!” “Hi!” “How are you?” “Good and you?”). In this case it is not necessary that there was physical contact with the person.”)

#TOSCRIPTING: as done for the pop up message “Click here to review the definition of “close contact”. Client also asked to have another pop up… if two pop ups are too much and cause crashes, we can condense working into one single pop up. The wording link for pop up would change into: “Click here to review the definition of “close contact” and reread the instructions on how to enter names”
The wording to add in the pop up message is above is this one “ <b>ATTENTION</b> Enter a unique generic name to identify each person contacted. If necessary, you can differentiate people by adding a name or initials (for example: friend Francesco, colleague Anna etc ) . ”

#TOSCRIPTING: here we would need like 5 boxes by default, but the important “trick” would be that once the respondent fills the fifth, then a sixth appears. If they fill a 6th then a 7th appears and so on.

#Base: Total

#Filter

#Receiverif​ not adult : child , if respondent_type_LF =1 ->
if respondent_type = 2 insert blue bold warning message “This question concerns you, [“son” if childgender=1] [“daughter”if childgender=2] aged [$pipe-in:childage] as the recipient of this survey”

#Question type: single grid

[c_conviventi] Indicate which of the following people you live with have had <b>close contact</b> at home YESTERDAY and which have not.
#toscripting: resp_type=1 rewording: see excel file

#toscripting:
[ In rows]: in case of You, Your son/daughter: same “pipes-in” as in conviventi_eta_xxx questions (names + age numbers pipes-in). In case of “other cohabitant” in conviventi_eta_xxx, please pipe-in written name from [c_conviventi_name] and age from conviventi_eta_xxx . Please exclude the receiver pipe-in: receiver will be excluded from pipe-in rows: if respondent_type=2,3 they will not see “You", if respondent_type=1 (0-13yo) they will not see “My son/daughter involved in this survey”). Logic is we weed all cohabitants to appear, excluding the receiver of the survey.

Example for respondent_type=1 rows

1. I had close contact yesterday (physical contact or exchange of at least 5 words)
   rewording: see excel file
2. I didn't have close contact yesterday
   rewording: see excel file

#Question type: INTERLUDE TEXT if respondent_type_LF =1 ->

In the following questions we will ask you to list all the <b>people with whom you had close contact YESTERDAY in different places</b> (for example: at your home, at other people's homes, at school/work, in shops, on public transport, etc.).

Identify each <b>person – separately</b> - with a generic name (<i>for example: friend, colleague, plumber, shop assistant</i>), you will need to distinguish them in the next phase of the questionnaire .

<b>ATTENTION</b>, the generic name must be unique ( you cannot repeat the same name twice ), if necessary you can differentiate people by adding a name or initials (<i>for example: friend Francesco, colleague Anna, etc.</i>).

**#toscripting: if respondent is child (childage=5to13)**

NOTE: *If [pipe-in: "your son" if childgender=1, “your daughter" if childgender=2] is not* [pipe-in: “stato” if childgender=1, “stata” if childgender=2] *present so far, we invite you to answer the next questions with its support.*

#Base: Total

#Filter

#Receiver if not adult: child, if respondent_type_LF =1 -> NO WARNING MESSAGE (neither for resp type =1 nor 2)

#Question type : single

[contact_compilation] This is a TEST question that helps us to fill out the questionnaire CORRECTLY.

In the next questions we will ask you to list the people with whom you have had close contact in different contexts. For example, if you have had close contact with 4 people (Mario, Sara, Mario's son and Sara's daughter), you will have to fill in 4 boxes , as shown in the image below.

*#toscripting: place image in this position*


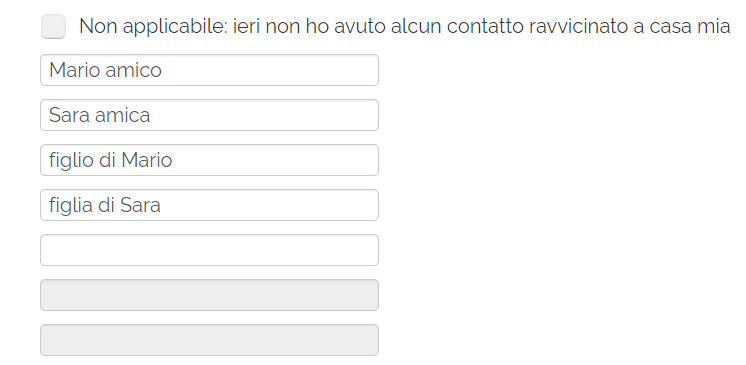


Now answer this question: How many people you have had close contact with can you fit in each box ? *Select one answer only*

1. Only one person per box
2. Up to two people per box
3. How many people do I want per box?

#toscripting: **warning message** if code is not 1: “In the next questions, in which you will have to list the people with whom you had close contact yesterday, YOU WILL HAVE TO INSERT ONE PERSON PER BOX”, correct your answer to continue”. **Do not let respondent proceed if** keep selecting code 2 or 3.

#Base: Total

#Filter

#Receiverif​ not adult : child , if respondent_type_LF =1 ->
if respondent_type = 2 insert blue bold warning message “This question concerns you, [“son” if childgender=1] [“daughter”if childgender=2] aged [$pipe-in:childage] as the recipient of this survey”

#Question type: open text boxes,

[ c_home ] Think of all the <b> people who DO NOT LIVE with you </b> with whom you have had <b> close contact YESTERDAY AT YOUR HOUSE </b> and list them below <b> one per box </b> .
*(for example friends or relatives who came to visit, neighbors, boiler man, postman, plumber, cleaner, etc.).*[rewording to update]

[possible contact 1]

[possible contact 2]

[possible contact 3]

[possible contact 4]

[possible contact 5]
… etc …

<966> *Not applicable: I did not have any close contact at my home with non-cohabiting people yesterday* MOVE ABOVE

#Base: Who work and have not worked remotely yesterday

#Filter: if presence_work =2

#Receiverif​ not adult : child ( only when childage >=16)
if respondent_type = 2 insert blue bold warning message “This question concerns you, [“son” if childgender=1] [“daughter”if childgender=2] aged [$pipe-in:childage] as the recipient of this survey”

#Question type: open text boxes

[ c_work ] Think of all the <b> people </b> you had <b> close contact with YESTERDAY AT WORK </b> and list them, <b> one per box </b>, in the boxes below.
*If you had close contact with a significant number of people during your work day (e.g. customers for a clerk/front-office worker or students for a teacher), list only the most relevant ones (interactions lasting more than 15 continuous minutes).
Note: if there are any of these people that you have already included previously, DO NOT include them in the list below .* #Toscripting: this part “exclude contact from the list below” has to be removed: in all these c_xxx questions

[possible contact 1]

[possible contact 2]

[possible contact 3]

[possible contact 4]

[possible contact 5]
… etc …

<966> *No new contacts to report* MOVE ABOVE

#Base: All students who went to school yesterday

#Filter: if Presence_School =2
**and** date (date based on Presence_School which will automatically filter this question)

#Receiver if not adult: child, if respondent_type_LF =1 ->
if respondent_type = 2 insert blue bold warning message “This question concerns you, [“son” if childgender=1] [“daughter”if childgender=2] aged [$pipe-in:childage] as the recipient of this survey”

#Question type: open text boxes
note: please make sure of bold symbols

[ c_school ] Think about all the <b> people </b> you have had <b> close contact with YESTERDAY AT SCHOOL </b> ( *including nursery, kindergarten, elementary, middle, high school and university* ) and list them, <b> one per box </b>, in the boxes below.
*If yesterday, during your school day you had close contact with a considerable number of people, report only the most significant ones (interactions lasting more than 15 continuous minutes).*
*Note: if among these people there is one that you have already included previously, DO NOT include them in the list below.*

[possible contact 1]

[possible contact 2]

[possible contact 3]

[possible contact 4]

[possible contact 5]
… etc …

<966> *No new contacts to report* MOVE ABOVE

#Base: Total

#Filter: if isolation != 1

#Receiverif​ not adult : child , if respondent_type_LF =1 ->
if respondent_type = 2 insert blue bold warning message “This question concerns you, [“son” if childgender=1] [“daughter”if childgender=2] aged [$pipe-in:childage] as the recipient of this survey”

#Question type: open text boxes

[ c_homeguest ] Think of all the </b> people </b> you had <b> close contact with YESTERDAY at OTHER PEOPLE'S HOUSES </b> and list them, <b> one per box </b >, in the boxes below.
*Note: If any of these people are people you have already listed, DO NOT list them in the following list.*

[possible contact 1]

[possible contact 2]

[possible contact 3]

[possible contact 4]

[possible contact 5]
… etc …

<966> *No new contacts to report* MOVE ABOVE

#Base: Total

#Filter: if isolation != 1

#Receiverif​ not adult : child , if respondent_type_LF =1 ->
if respondent_type = 2 insert blue bold warning message “This question concerns you, [“son” if childgender=1] [“daughter”if childgender=2] aged [$pipe-in:childage] as the recipient of this survey”

#Question type: open text boxes – **20 boxes**

[ c_restaurant ] If <b> YESTERDAY </b> you went to any <b> RESTAURANT PLACE </b> ( *for example, bar, restaurant, ice cream parlor, pizzeria, pastry shop* ), think back to any <b> people <b> with whom you had <b> close contact </b> on these occasions ( *for example, with people sitting at the table/counter with you, with waiters or shop assistants* ) and list them, <b> one per box </b>, in the boxes below.
*Note: if among these people there is one that you have already included previously, DO NOT include them in the list below.*

[possible contact 1]

[possible contact 2]

[possible contact 3]

[possible contact 4]

[possible contact 5]
… etc …

<966> *No new contacts to report* MOVE ABOVE

#Base: Total

#Filter: if isolation != 1

#Receiverif​ not adult : child , if respondent_type_LF =1 ->
if respondent_type = 2 insert blue bold warning message “This question concerns you, [“son” if childgender=1] [“daughter”if childgender=2] aged [$pipe-in:childage] as the recipient of this survey”

#Question type: open text boxes **20 boxes**

[ c_leisure ] If <b> YESTERDAY </b> you did any <b> SPORTS OR PLEASURE ACTIVITY </b> (for example, you went to the cinema, to the gym/swimming pool, to the park, you volunteered, etc.) think back to the <b> people <b> with whom you had <b> close contact </b> on all these occasions and list them, <b> one per box </b>, in the boxes below.
*Note: if among these people there is one that you have already included previously, DO NOT include them in the list below.*

[possible contact 1]

[possible contact 2]

[possible contact 3]

[possible contact 4]

[possible contact 5]
… etc …

<966> *No new contacts to report* MOVE ABOVE

#Base: Total

#Filter: if isolation != 1

#Receiverif​ not adult : child , if respondent_type_LF =1 ->
if respondent_type = 2 insert blue bold warning message “This question concerns you, [“son” if childgender=1] [“daughter”if childgender=2] aged [$pipe-in:childage] as the recipient of this survey”

#Question type: open text boxes

[ c_shopping ] If <b> YESTERDAY </b> you went <b> SHOPPING </b> (in shops, supermarkets, markets, shopping centres), think back to the <b> people <b> with whom you had <b> close contact </b> on these occasions (for example, with people who accompanied you, shop assistants or other customers) and list them, <b> one per box </b>, in the boxes below.
*Note: if among these people there is one that you have already included previously, DO NOT include them in the list below.*

[possible contact 1]

[possible contact 2]

[possible contact 3]

[possible contact 4]

[possible contact 5]
… etc …

<966> *No new contacts to report*

MOVE UP

#Base: Total

#Filter: if isolation != 1

#Receiverif​ not adult : child , if respondent_type_LF =1 ->
if respondent_type = 2 insert blue bold warning message “This question concerns you, [“son” if childgender=1] [“daughter”if childgender=2] aged [$pipe-in:childage] as the recipient of this survey”

#Question type: open text boxes

[ c_transport ] If <b> YESTERDAY </b> you used one or more <b> MEANS OF TRANSPORT </b> (including a car), think back to the <b> people <b> you had <b> close contact with </b> on those occasions and list them, <b> one per box </b >, in the boxes below.
*Note: if any of these people are those you have already included previously, DO NOT include them in the list below.*

[possible contact 1]

[possible contact 2]

[possible contact 3]

[possible contact 4]

[possible contact 5]
… etc …

<966> *No new contacts to report*

MOVE UP

#Base: Total

#Filter: if isolation != 1

#Receiverif​ not adult : child , if respondent_type_LF =1 ->
if respondent_type = 2 insert blue bold warning message “This question concerns you, [“son” if childgender=1] [“daughter”if childgender=2] aged [$pipe-in:childage] as the recipient of this survey”

#Question type: open text boxes

[ c_otherindoor ] If <b> YESTERDAY </b> you had <b> close contact INDOOR occasions other than those presented so far </b> list the <b> people <b> with whom you have had them, <b> one per box </b>, in the boxes below.
*Note: if among these people there are any that you have already entered previously, DO NOT enter them in the list below.*

[possible contact 1]

[possible contact 2]

[possible contact 3]

[possible contact 4]

[possible contact 5]
… etc …

<966> *No new contacts to report* MOVE ABOVE

#Base: Total

#Filter: if isolation != 1

#Receiverif​ not adult : child , if respondent_type_LF =1 ->
if respondent_type = 2 insert blue bold warning message “This question concerns you, [“son” if childgender=1] [“daughter”if childgender=2] aged [$pipe-in:childage] as the recipient of this survey”

#Question type: open text boxes

[ c_otheroutdoor ] If <b> YESTERDAY </b> you had <b> close contact OUTDOORS other than those presented so far </b> , please list the <b> people <b> with whom you had them, <b> one per box </b>, in the boxes below.
*Note: If any of these people are people you have already listed previously, DO NOT list them in the following list.*

[possible contact 1]

[possible contact 2]

[possible contact 3]

[possible contact 4]

[possible contact 5]
… etc …

<966> *No new contacts to report* MOVE ABOVE

#TOSCRIPTING :**​**

PLEASE CREATE A **TEST MODE** VARIABLE WHERE THERE WILL BE THE TOTAL COUNT (SUM) OF CONTACTS WRITTEN IN ALL THE ABOVE MODULE 2B OPEN QUESTIONS
(eg 3 open boxes filled in c_home + 2 filled in c_work = 5 in total)

[ total_contacts ] [TOTAL COUNT TO APPEAR] – please insert also c_coviventi rows=1 in the count

#TOSCRIPTING :**​**

PLEASE IN **TEST MODE** LET ALL THE CONTACTS APPEAR (all the contacts filled in c_home to c_otheroutdoor questions)

[ contacts_name ] [total contact list to appear] please insert also c_cohabitants rows=1 in the count

#toscripting: from closed to c_vaccino questions , please also add pipe in names as they appear from c_conviventi rows=1

#Base: Had at least one close contact

#Filter: [ total_contacts ]>=1

#Receiverif​ not adult : child , if respondent_type_LF =1 ->
if respondent_type = 2 insert blue bold warning message “This question concerns you, [“son” if childgender=1] [“daughter”if childgender=2] aged [$pipe-in:childage] as the recipient of this survey”

#Question type: single grid – ~~random rows~~ , please make the contact names in bold, leave [place]pipes in not in bold

[closed] Please indicate which of the following contacts occurred mostly indoors and which mostly outdoors. Select one response per line.

| -[closed_1 ]#TOSCRIPTING: insert **Contact name 1** had $pipein[PLACE] |
| --- |
| -[closed_2 ]#TOSCRIPTING: insert **Contact name 2** had $pipein[PLACE] |
| -[closed_3 ]#TOSCRIPTING: insert **Contact name 3** had $pipein[PLACE] |
| -[closed_4 ]#TOSCRIPTING: insert **Contact name 4** had $pipein[PLACE] |
| -[closed_5] #TOSCRIPTING: insert **Contact name 5** had $pipein[PLACE] |
| **… AND SO ON depending on number of contacts in [total_contacts]** |
|  |

**#TOSCRIPTING:** [PLACE] **TABLE:**

**Please note you've inverted c_home and c_homeguest pips in**

| In which question was contact written | Text to write in rows $ pipein |
| --- | --- |
| C_cohabitants | had at home |
| C_home | had at home |
| C_school | had at school |
| C_work | had at work |
| C_transport | had on a means of transport |
| C_shopping | got while shopping |
| C_restaurant | had in a catering establishment |
| C_leisure | had in my spare time |
| C_homeguest | had at someone else's house |
| C_otherindoor | #as by email Mar 1, please do not show this but count it in total_contacts_indoor |
| C_outdoor | #as by email Mar 1, please do not show this |

1. Indoors
2. Outdoor

#TOSCRIPTING :**​**

PLEASE CREATE A **TEST MODE** VARIABLE WHERE THERE WILL BE THE TOTAL COUNT (SUM) OF CONTACTS THAT HAD CODE 1 “AL INDOORS” IN [CLOSED] QUESTION

[ total_contacts_indoor ] [TOTAL COUNT TO APPEAR]

#Base: Total

#Filter

#Receiverif​ not adult : child , if respondent_type_LF =1 ->
if respondent_type = 2 insert blue bold warning message “This question concerns you, [“son” if childgender=1] [“daughter”if childgender=2] aged [$pipe-in:childage] as the recipient of this survey”

#Question type : open integer – **min 0 – max 15000,**
REMOVE WARNING MESSAGE, LEAVE THE RESPONDENT FREE (WITHIN 0 AND 15K INTEGER):

[ c_sharedindoor ] HOW MANY PEOPLE DID YOU SHARE <b>INDOOR SPACES</b> WITH YESTERDAY for an extended period of time ( more than 30 minutes)?

Please also include the close contact people listed above if you shared an indoor space with them for more than 30 minutes.
For example, classmates if you are a student, or office/work colleagues if you are a worker, a compartment in a transport vehicle, etc.

*Please provide your best estimate in the box below.*#toscripting: re-shape this with the spaces as above

[INTEGER NUMBER]

| #Module 2B: QUESTIONS BY CONTACT |
| --- |

#TOSCRIPTING: in all these module questions please show contacts in rows (randomize order and keep same order on different questions).
freeze the TOP row of grid

#Base: Had at least one close contact

#Filter: [ total_contacts ]>=1

#Receiver if not adult: child

#Question type: open integer grid, ~~random rows~~
#toscripting: please do not show cohabitants ( cohabitants ) here as we already know their age, cohabitants will be shown from c_fisico on

[ c_age ] How old are the following people? Write the age of each person in the appropriate box. *If you don't know the exact age, write the age you think they are.*

| -[c_eta_1]contact name 1 |
| --- |
| -[c_eta_2]contact name 2 |
| -[c_eta_3]contact name 3 |
| -[c_eta_4]contact name 4 |
| -[c_eta_5]contact name 5 |

… AND SO ON DEPENDING ON [total_contacts]

[TYPE NUMBER] (FROM 0 TO 100)

#Base: Had at least one close contact

#Filter: [ total_contacts ]>=1

#Receiverif​ not adult : child , if respondent_type_LF =1 ->
if respondent_type = 2 insert blue bold warning message “This question concerns you, [“son” if childgender=1] [“daughter”if childgender=2] aged [$pipe-in:childage] as the recipient of this survey”

#Question type: single grid, ~~random rows~~

[ c_fisico ] There was physical contact of any kind ~~(e.g. did you touch each other)~~ in yesterday's meeting with the following people? Select one answer per person.

| -[c_fisico_1]contact name 1 |
| --- |
| -[c_fisico_2]contact name 2 |
| -[c_fisico_3]contact name 3 |
| -[c_fisico_4]contact name 4 |
| -[c_fisico_5]contact name 5 |

… AND SO ON DEPENDING ON [total_contacts]

1. Yes
2. No

#Base: Had at least one close contact

#Filter: [ total_contacts ]>=1

#Receiverif​ not adult : child , if respondent_type_LF =1 ->
if respondent_type = 2 insert blue bold warning message “This question concerns you, [“son” if childgender=1] [“daughter”if childgender=2] aged [$pipe-in:childage] as the recipient of this survey”

#Question type: single grid, ~~random rows~~ , random reverse order for columns

[ c_mask ] Which of you wore a mask the entire time ? Select one answer per person.

| -[c_mask_1]contact name 1 |
| --- |
| -[c_mask_2]contact name 2 |
| -[c_mask_3]contact name 3 |
| -[c_mask_4]contact name 4 |
| -[c_mask_5]contact name 5 |

… AND SO ON DEPENDING ON [total_contacts]

1. Neither fixed
2. Only me
3. Only this person
4. Both

<977 fixed>I don't remember

#Base: Had at least one close contact

#Filter: [ total_contacts ]>=1

#Receiver if not adult: child, if respondent_type_LF =1 **AND childage >=5** ->

#Question type: single grid,if respondent_type = 2 insert blue bold warning message “This question concerns you, [“son” if childgender=1] [“daughter”if childgender=2] aged [$pipe-in:childage] as the recipient of this survey”

[ c_reddito_percepito ] In your opinion, on a scale of 1 to 5, what level of economic well-being do the following people rank in relation to the Italian population?
Select one answer per person.

| -[c_received_income_1]contact name 1 |
| --- |
| -[c_received_income_2]contact name 2 |
| -[c_received_income_3]contact name 3 |
| -[c_received_income_4]contact name 4 |
| -[c_received_income_5]contact name 5 |

… AND SO ON DEPENDING ON [total_contacts]

1. 1= very low well-being
2. 2 = low well-being
3. 3 = average well-being
4. 4 = high well-being
5. 5 = very high well-being

<977>I don't know

#Base: Had at least one close contact

#Filter: [ total_contacts ]>=1

#Receiver if not adult: child

#Question type: single grid

[ c_istruzione ] What is the highest level of education achieved by the following people?
Select one answer per person.

| -[c_instruction_1]contact name 1 $pipe-in [c_age] as follows, in every row: contact name 1 ( $pipe-in years) |
| --- |
| -[c_statement_2]contact name 2 same $pipe-in in all rows |
| -[c_istruzione_3]contact name 3 |
| -[c_ instruction_4]contact name 4 |
| -[c_istruzione _5]contact name 5 |

… AND SO ON DEPENDING ON [total_contacts]

1. Middle school diploma (or less)
2. High school diploma (lyceum, technical or vocational institute) not selectable if [c_eta] (same row)<=17
3. Degree or higher (master's, doctorate, etc.) not selectable if [c_eta] (same row)<=20

<977>I don't know

#TOSCRIPTING: warning message if inconsistency in code 2 and code 3: “Some of the education levels listed are not plausible for the age of the person in question, please review your answers”
PLEASE ALLOW THE RESPONDENTS TO go ahead after showing warning message twice.

#Base: Had at least one close contact

#Filter: [ total_contacts ]>=1

#Receiverif​ not adult : child , if respondent_type_LF =1 ->
if respondent_type = 2 insert blue bold warning message “This question concerns you, [“son” if childgender=1] [“daughter”if childgender=2] aged [$pipe-in:childage] as the recipient of this survey”

#Question type: single grid, Required=SOFT (leave it =SOFT, but adapt warning message “ Please provide a response for at least one contact ", make the message appear ONLY IF respondent does not select any answer in any row)

[ c_relationship ] What is your relationship with the person contacted? Select one answer per person.

| -[c_relation_1]contact name 1 |
| --- |
| -[c_relation_2]contact name 2 |
| -[c_relation_3]contact name 3 |
| -[c_relationship_4]contact name 4 |
| -[c_relation_5]contact name 5 |

… AND SO ON DEPENDING ON [total_contacts]
#toscripting: auto-assign code 1 for rows coming from c_coviventi in this question

1. Cohabiting relative/family member or roommate
2. Non-cohabiting relative/family member
3. Friend or acquaintance
4. Co-worker #show if respondent_type=3 AND [occupation]=1,2,3,6,7,8,9. or Show if respondent_type=2 AND childage respondent >=16 AND [occupation]=1,2,3 ,6,7,8,9
5. School/College Mate #show if respondent_type=1 or (respondent_type=2 childage respndent=14,15) or (respondent_type=2,3 AND occupation=5,6,7
6. Other

#Base: Had at least one close contact

#Filter: [ total_contacts ]>=1

#Receiverif​ not adult : child , if respondent_type_LF =1 ->
if respondent_type = 2 insert blue bold warning message “This question concerns you, [“son” if childgender=1] [“daughter”if childgender=2] aged [$pipe-in:childage] as the recipient of this survey”

#Question type: single grid (drop down menu), Required= SOFT ( leave it =SOFT, but adapt warning message “ Please provide a response for at least one contact ", make the message appear ONLY IF respondent does not select any answer in any row)

[ c_frequency ] On how many days have you had close contact with this person in the past 14 days (including today)? Select one answer per person.
*If you don't remember the exact number, select your best estimate.*

| -[c_frequency_1]contact name 1 |
| --- |
| -[c_frequency_2]contact name 2 |
| -[c_frequency_3]contact name 3 |
| -[c_frequency_4]contact name 4 |
| -[c_frequency_5]contact name 5 |

… AND SO ON DEPENDING ON [total_contacts]

1. 1
2. 2
3. 3
4. 4
5. 5
6. 6
7. 7
8. 8
9. 9
10. 10
11. 11
12. 12
13. 13
14. 14

#Base: Had at least one close contact

#Filter: [ total_contacts ]>=1

#Receiver if not adult: no need for warning message on receiver here, no need for rewording too
if respondent_type = 2 insert blue bold warning message “This question is about you, [“son” if childgender=1] [“daughter”if childgender=2] aged [$pipe-in:childage] as the recipient of this survey”

#Question type: single grid, Required=SOFT (leave it =SOFT, but adapt warning message “ Please provide a response for at least one contact ", make the message appear ONLY IF respondent does not select any answer in any row)

[ c_gender ] What is the gender of the following people? Select one answer per person.

| -[c_gender_1]contact name 1 |
| --- |
| -[c_gender_2]contact name 2 |
| -[c_gender_3]contact name 3 |
| -[c_gender_4]contact name 4 |
| -[c_gender_5]contact name 5  … AND SO ON DEPENDING ON [total_contacts] |

1. Male
2. Female

#Base: Had at least one close contact

#Filter: [ total_contacts ]>=1

#Receiverif​ not adult: child , if respondent_type_LF =1 ->
if respondent_type = 2 insert blue bold warning message “This question concerns you, [“son” if childgender=1] [“daughter”if childgender=2] aged [$pipe-in:childage] as the recipient of this survey”

#Question type: single grid)
if c_fisico_rows=1 don't ask question for the same row, auto assign code 1 Required=SOFT (leave it =SOFT, but adapt warning message “Please provide a response for at least one contact ", make the message appear ONLY IF respondent does not select any answer in any row)

[ c_distance ] What minimum distance was maintained during the following non-physical contacts?
Select one answer per person. *If you do not remember, select the “I do not remember” option or simply do not answer for that person.*

| -[c_distance_1]contact name 1 |
| --- |
| -[c_distance_2]contact name 2 |
| -[c_distance_3]contact name 3 |
| -[c_distance_4]contact name 4 |
| -[c_distance_5]contact name 5 |

… AND SO ON DEPENDING ON [total_contacts]

1. Less than 1 meter
2. Between 1 meter and 2 meters
3. More than 2 meters

<977 fixed>I don't remember

#Base: Had at least one close contact

#Filter: [ total_contacts ]>=1

#Receiver if not adult: child

#Question type: single grid, ~~random rows~~ Required=SOFT (leave it =SOFT, but adapt warning
message “Please provide a response for at least one contact ", make the message appear ONLY IF respondent does not select any answer in any row)

[ c_vaccino ] Have the following people already received one or more doses of the COVID-19 vaccine? Select one answer per person. *If you do not remember, select the option “I don't know/I don't remember.”*

| -[c_vaccine_1]contact name 1 |
| --- |
| -[c_vaccine_2]contact name 2 |
| -[c_vaccino_3]contact name 3 |
| -[c_vaccino_4]contact name 4 |
| -[c_vaccino_5]contact name 5 |

… AND SO ON DEPENDING ON [total_contacts]

1. Yes
2. No

<977>I don't know/I don't remember

#Base: Children aged 5-13 yo

#Filter: if receiver is child and childage =5to13

#Receiver if not adult: parent

#Question type : single

[child013_presence] Were you able to get the support of [pipe-in: "your son" if childgender=1, “your daughter" if childgender=2] of $pipein [childage] years in answering the questions just asked about contacts made yesterday?
*If [pipe-in: "your son" if childgender=1, “your daughter" if childgender=2] was not* [pipe-in: “could” if childgender=1, “could” if childgender=2] *present, this is not a problem* .

1. Yes, he was present
2. No, he wasn't present

#TOSCRIPTING: AT THE END OF MODULE B, PLEASE INSERT A CHECK VARIABLE TO SEE HOW MANY RESPONDENTS END HERE THE SURVEY (IE DROP-OUT RATE)

#TOSCRIPTING: PLEASE INSERT A TEST MODE VARIABLE TO SEE HOW MANY MINUTES THE RESPONDENTS TOOK TO ANSWER MODULE 2B called [minutes_module2B], AND ALL MODULE 2 (2A.1 + 2A.2 + 2B) called [minutes_module2]

| #Module 3: PERCEIVED RISK OF INFECTION |
| --- |

#TOSCRIPTING: show this module only to adults AND children whose childhood>=14

#Base: Total ( respondent (aged 14+)

#Filter: age or child age >=14

#Receiverif​ not adult : child ( if child age >=14), if childage <=13: parent
if respondent_type = 2 insert blue bold warning message “This question concerns you, [“son” if childgender=1] [“daughter”if childgender=2] aged [$pipe-in:childage] as the recipient of this survey”

#Question type: single grid, randomize rows (same order of pers_risk rows) – skip option health

[inf] Do you personally know at least one person who has contracted, been hospitalized, or died from each of the following diseases? Select one answer per disease.

-[inf_sarscov] COVID-19

-[inf_flu]Influenza

-[inf_measles]Measles

1. I only know someone who has contracted the disease
2. I also know someone who has been hospitalized (but no one who has died)
3. I also know someone who died
4. *I don't know anyone who has contracted the disease* # toscripting : make italic

| #Module 4: Vaccination uptake |
| --- |

#Base: Total (5+)

#Filter: if age or childage >=5

#Receiver if not adult: child, if respondent_type_LF =1 ->
if respondent_type = 2 insert blue bold warning message “This question concerns you, [“son” if childgender=1] [“daughter”if childgender=2] aged [$pipe-in:childage] as the recipient of this survey”

#Question type: single - skip option health

[ vacc_covid ] What is your SARS-CoV-2 (COVID-19) vaccination status?
Select one answer only.

1. I am not vaccinated by choice
2. I am not vaccinated because I have a health exemption
3. I have already booked the appointment for the first dose
4. I got the first dose, but not the second
5. I did the second dose, but not the booster (third dose)
6. I did the booster but not the fourth dose
7. I did the booster and the fourth dose

<955fixed>Other (specify) [SPECIFY]

#Base: Total (5+)

#Filter: if age or childage >=5, if vacc_covid =1

#Receiver if not adult: PARENT, if respondent_type_LF =1OR 2 ->

#Question type: multiple, randomize - skip option health

[ no_vax_reason ] What motivated your choice not to get vaccinated?
Select all that apply.

1. I have doubts about the effectiveness of the vaccine
2. I have doubts about the (health) safety of the vaccine
3. I am against mandatory vaccination
4. I am against it because covid-19 does not pose a serious threat to my health.
5. I am against the green pass
6. I was advised against it by an acquaintance
7. I haven't had time to inform myself properly yet
8. I think the vaccine is a waste of money for the benefit of big pharmaceutical companies

<955fixed>Other (specify) [SPECIFY]

#Base: Total

#Filter:

#Receiverif​ not adult : child , if respondent_type_LF =1 ->
if respondent_type = 2 insert blue bold warning message “This question concerns you, [“son” if childgender=1] [“daughter”if childgender=2] aged [$pipe-in:childage] as the recipient of this survey”

#Question type: single - skip option health

[ vacc_altri ] Are you vaccinated against at least one of the following diseases: Human Papilloma Virus (HPV), Meningococcus, Pneumococcus, Hepatitis A, Herpes Zoster/Shingles?
Select one answer only.

1. Yes
2. No

<977>I don't know/I don't remember

#Base: Total

#Filter:

#Receiverif​ not adult : child if childage =14,15,16,17; parent if childage =0to13 ( if childage =0to13)
if respondent_type = 2 insert blue bold warning message “This question concerns you, [“son” if childgender=1] [“daughter”if childgender=2] aged [$pipe-in:childage] as the recipient of this survey”

#Question type: single - skip option health

[refuse] Have you ever actively refused a vaccine when it was offered to you?
Select one answer only.

1. Yes
2. No

<977>I don't know/I don't remember

#TOSCRIPTING: FINAL TEXT

[ txt_final ] You have completed the questionnaire, we thank you very much for your contribution!

#TOSCRIPTING: this will be the last thing respondents see, do not add pdls at the end of the survey (eg now we have IT_voted2018)

1. * Alcohol or drug consumption abuse; Sickle cell disease or thalassemia; Neurological diseases; Pregnancy; AIDS/HIV infection; Chronic liver diseases; Chronic kidney diseases; Chronic lung diseases (e.g., COPD, asthma, cystic fibrosis, etc.). [↑](#footnote-ref-2)
